# Supplementary material
Source: publisher figshare collection journal article supplement (https://gsapubs.figshare.com/ndownloader/files/23317043)
Supplement: Supplementary file 1 [file 23317043]

## Sheet: Read me
Namib Desert Rock Hyrax Midden Stable Nitrogen and Hydrogen Isotope Data
NAME OF DATA SET:
Namib Desert Rock Hyrax Midden Stable Nitrogen and Hydrogen Isotope Data
LAST UPDATE: 06/2019
CONTRIBUTOR: Brian Chase, Centre National de Recherche Scientifique
ORIGINAL REFERENCE:
Brian M. Chase*, Eva M. Niedermeyer, Arnoud Boom, Andrew S. Carr. Manuel Chevalier, Feng He, Michael E. Meadows, Neil Ogle, Paula J. Reimer
Orbital controls on Namib Desert hydroclimate over the last 50,000 years
Geology
brian.chase@umontpellier.fr
http://dx.doi.org/10.not yet attributed
ABSTRACT:
Despite being one of the world’s oldest deserts, and the subject of decades of research, evidence of past climate change in the Namib Desert is extremely limited. As such, there is significant debate regarding the nature and drivers of climate change in the low latitude drylands of southwestern Africa. Here we present data from stratified accumulations of rock hyrax urine that provide the first c…
GEOGRAPHIC REGION: Namib Desert
PERIOD OF RECORD: 50205 YrBP - -60 YrBP
FUNDING SOURCE: European Research Research Council; Starting Grant "HYRAX" no. 258657
DESCRIPTION:
Stable nitrogen isotope data (d15N) from rock hyrax middens from Spitzkoppe, Zizou and Pella
Stable hydrogen isotope data (dD) from rock hyrax middens from Spitzkoppe
Spitzkoppe (15.1955E, 21.83172S, 1120 m amsl.).
Zizou (15.96986E, 24.07162S, 1125 m amsl.).
Pella (19.13505E, -29.00113S, 490 m amsl.).

## Sheet: Namib d15N_norm_Gauss smooth
Age (cal BP)	Namib d15Nnorm_Gauss smooth	sd	plus	minus
-59.6	-0.214234	0.173279	-0.0409549	-0.387514
-38.2	-0.0764549	0.160703	0.0842482	-0.237158
-22.6	-0.00801295	0.129107	0.121094	-0.13712
-4.1	-0.0226891	0.170406	0.147717	-0.193095
21.5	-0.074945	0.246696	0.171751	-0.321641
22.1	-0.0738458	0.24873	0.174884	-0.322575
40.1	-0.0146928	0.33138	0.316687	-0.346073
59.7	-0.0268627	0.450545	0.423682	-0.477408
71.2	-0.0551165	0.484173	0.429056	-0.539289
80.3	-0.0546227	0.486613	0.43199	-0.541236
80.7	-0.0539995	0.486338	0.432338	-0.540337
97.6	0.0101683	0.456503	0.466671	-0.446335
103.3	0.0389925	0.442977	0.481969	-0.403984
109.5	0.0648615	0.429849	0.49471	-0.364987
121.6	0.0745873	0.415989	0.490577	-0.341402
125.9	0.059704	0.414619	0.474323	-0.354915
128	0.0485214	0.414069	0.46259	-0.365548
148	-0.153423	0.356411	0.202989	-0.509834
151.4	-0.190877	0.330459	0.139582	-0.521336
169.3	-0.293899	0.179137	-0.114762	-0.473037
175.7	-0.296424	0.14857	-0.147854	-0.444993
189.7	-0.291832	0.128085	-0.163747	-0.419917
191.2	-0.292276	0.12802	-0.164256	-0.420297
192.9	-0.293143	0.128211	-0.164933	-0.421354
199.4	-0.299856	0.130592	-0.169264	-0.430448
216	-0.32022	0.138516	-0.181703	-0.458736
223.7	-0.312897	0.143779	-0.169118	-0.456675
231.3	-0.290785	0.150329	-0.140456	-0.441114
243.4	-0.237917	0.157829	-0.0800877	-0.395746
245.5	-0.227999	0.158473	-0.0695264	-0.386472
250	-0.207053	0.159247	-0.0478062	-0.3663
251.7	-0.199397	0.159364	-0.0400327	-0.358761
266.6	-0.146983	0.162501	0.015518	-0.309484
273.1	-0.136007	0.171442	0.0354349	-0.307449
281	-0.130528	0.193708	0.0631791	-0.324236
284.9	-0.128469	0.208858	0.0803887	-0.337327
298.8	-0.10153	0.268442	0.166911	-0.369972
312.1	-0.0395492	0.297857	0.258308	-0.337406
313.5	-0.0322228	0.298437	0.266214	-0.33066
320	0.000819235	0.295954	0.296773	-0.295135
326	0.0284112	0.288302	0.316713	-0.259891
335.7	0.0663906	0.271926	0.338317	-0.205535
344.8	0.0981123	0.258457	0.356569	-0.160345
345.8	0.101615	0.257336	0.358952	-0.155721
347.9	0.109088	0.255323	0.364411	-0.146235
357.5	0.146848	0.254455	0.401303	-0.107608
359.9	0.157522	0.257081	0.414603	-0.0995593
372.4	0.219371	0.291245	0.510616	-0.0718743
382.1	0.265253	0.330144	0.595398	-0.064891
390.5	0.297758	0.360274	0.658032	-0.0625166
394.1	0.310417	0.371196	0.681613	-0.0607788
399.2	0.32882	0.385045	0.713865	-0.0562245
399.8	0.331113	0.386589	0.717702	-0.0554765
405	0.353089	0.399724	0.752813	-0.0466349
413.7	0.403029	0.422897	0.825926	-0.0198684
414.1	0.405832	0.424034	0.829866	-0.0182025
426.6	0.516765	0.459884	0.976649	0.0568806
430.7	0.56075	0.469717	1.03047	0.0910332
438.5	0.646832	0.482699	1.12953	0.164132
444.5	0.709075	0.487898	1.19697	0.221177
447.6	0.738072	0.489553	1.22763	0.248518
459.3	0.817108	0.495022	1.31213	0.322086
470.5	0.834754	0.502059	1.33681	0.332696
474.5	0.826023	0.503602	1.32962	0.322421
479.8	0.802504	0.503081	1.30558	0.299423
481.1	0.794734	0.502321	1.29705	0.292413
483.4	0.779162	0.500211	1.27937	0.27895
495.3	0.669663	0.469037	1.1387	0.200627
506.1	0.565373	0.413844	0.979216	0.151529
507.1	0.557684	0.408565	0.966249	0.149119
519.8	0.510072	0.366006	0.876079	0.144066
527.8	0.524424	0.364168	0.888592	0.160257
531	0.536865	0.365372	0.902237	0.171492
534.4	0.553142	0.366278	0.91942	0.186865
538	0.573199	0.36595	0.939149	0.207249
543.2	0.606482	0.361962	0.968444	0.24452
553.6	0.685857	0.338973	1.02483	0.346884
563.2	0.766436	0.301807	1.06824	0.464629
574.7	0.843502	0.254386	1.09789	0.589116
585	0.870015	0.236562	1.10658	0.633454
586.8	0.869759	0.237259	1.10702	0.632501
588.6	0.868011	0.239103	1.10711	0.628908
598	0.834773	0.263964	1.09874	0.57081
614.5	0.705158	0.331089	1.03625	0.374069
625.4	0.649038	0.39666	1.0457	0.252378
648.4	0.775547	0.573186	1.34873	0.202361
656.7	0.823105	0.600729	1.42383	0.222376
665.4	0.854829	0.61436	1.46919	0.240468
703.5	0.949573	0.589098	1.53867	0.360474
708.8	0.925499	0.592976	1.51848	0.332523
722.2	0.837002	0.600778	1.43778	0.236224
727.1	0.801135	0.599297	1.40043	0.201838
749.6	0.719799	0.566194	1.28599	0.153605
767.3	0.734605	0.533861	1.26847	0.200744
774.4	0.733925	0.52048	1.2544	0.213445
775	0.733855	0.5195	1.25336	0.214355
779.6	0.734736	0.513743	1.24848	0.220992
825.2	1.11001	0.568717	1.67873	0.541293
839.2	0.97492	0.526297	1.50122	0.448623
845.7	0.927664	0.499363	1.42703	0.428301
851.9	0.901061	0.476395	1.37746	0.424666
862.5	0.899652	0.460476	1.36013	0.439175
872	0.940959	0.485119	1.42608	0.45584
876.6	0.973104	0.509456	1.48256	0.463648
886.7	1.06573	0.574543	1.64027	0.491185
890.5	1.10666	0.597319	1.70398	0.50934
899.7	1.21368	0.634198	1.84788	0.579482
900.6	1.22444	0.63593	1.86037	0.588511
907.8	1.30954	0.635392	1.94493	0.674151
910.6	1.34116	0.628085	1.96925	0.713078
916.9	1.40606	0.598385	2.00444	0.807674
922.5	1.45339	0.560711	2.0141	0.892678
932.1	1.50595	0.492882	1.99883	1.01307
940.1	1.52146	0.457254	1.97871	1.0642
943.2	1.52074	0.452079	1.97282	1.06866
944.9	1.51873	0.45143	1.97016	1.0673
948.2	1.51147	0.454381	1.96585	1.05709
950.2	1.50486	0.458629	1.96349	1.04623
953.5	1.49021	0.468957	1.95916	1.02125
964.3	1.41329	0.514787	1.92808	0.898506
973.3	1.34	0.539821	1.87982	0.800178
984.6	1.30902	0.541186	1.85021	0.767833
985.7	1.31189	0.540139	1.85203	0.771749
988.2	1.32247	0.537118	1.85959	0.785351
996.9	1.3967	0.517334	1.91403	0.879365
1006	1.50622	0.47552	1.98174	1.0307
1016.8	1.6169	0.415582	2.03248	1.20132
1018.2	1.62739	0.409644	2.03704	1.21775
1030.3	1.68237	0.393725	2.0761	1.28865
1030.6	1.68311	0.394075	2.07719	1.28904
1038.5	1.69763	0.410546	2.10818	1.28709
1048.5	1.71414	0.437957	2.1521	1.27618
1051.3	1.72039	0.444875	2.16527	1.27552
1052.4	1.72316	0.447409	2.17057	1.27575
1060.5	1.75008	0.462071	2.21216	1.28801
1073.4	1.82082	0.466706	2.28753	1.35412
1079	1.85873	0.460608	2.31933	1.39812
1097.5	1.91709	0.448115	2.3652	1.46897
1111.3	1.85824	0.472297	2.33054	1.38594
1113	1.84872	0.47462	2.32334	1.3741
1122.8	1.79483	0.47887	2.2737	1.31596
1125.2	1.78235	0.477269	2.25962	1.30508
1126.8	1.77419	0.475605	2.2498	1.29859
1137.5	1.72185	0.453038	2.17488	1.26881
1147.4	1.6749	0.420577	2.09547	1.25432
1154.8	1.64204	0.398854	2.0409	1.24319
1156	1.63711	0.396239	2.03335	1.24087
1167.5	1.59938	0.391274	1.99065	1.2081
1180.9	1.58588	0.4202	2.00608	1.16568
1185.1	1.58947	0.428646	2.01811	1.16082
1195.8	1.61276	0.429089	2.04185	1.18367
1221.2	1.63971	0.269738	1.90945	1.36997
1230.9	1.60483	0.203597	1.80843	1.40123
1260.4	1.48243	0.156378	1.63881	1.32605
1265.2	1.4689	0.186845	1.65575	1.28206
1311.3	1.36382	0.606866	1.97068	0.756953
1316.7	1.38328	0.583752	1.96704	0.799532
1335.3	1.38927	0.46277	1.85204	0.926501
1347.2	1.34403	0.391001	1.73503	0.953031
1352.2	1.32366	0.36515	1.68881	0.958512
1383.4	1.39662	0.23652	1.63315	1.1601
1408.2	1.46079	0.256727	1.71752	1.20406
1438.8	1.15177	0.334126	1.4859	0.817644
1469.2	1.32189	0.434593	1.75648	0.887298
1479.5	1.38644	0.416346	1.80278	0.97009
1493.1	1.43449	0.364246	1.79873	1.07024
1508	1.46366	0.293755	1.75742	1.16991
1552.7	1.53321	0.234279	1.76748	1.29893
1563.1	1.56496	0.237168	1.80213	1.32779
1615	1.45444	0.313503	1.76794	1.14094
1623.7	1.43347	0.308242	1.74171	1.12523
1626.4	1.42687	0.305956	1.73283	1.12092
1636.7	1.39437	0.299155	1.69352	1.09521
1647.8	1.32985	0.308241	1.63809	1.02161
1659.1	1.22704	0.332995	1.56004	0.894049
1673	1.11077	0.347477	1.45825	0.763295
1680.1	1.07993	0.347779	1.42771	0.732154
1681.6	1.0762	0.347645	1.42385	0.728558
1694.5	1.07303	0.345121	1.41815	0.727907
1695.8	1.07433	0.34468	1.41901	0.729651
1703.7	1.08078	0.340996	1.42178	0.739785
1715	1.06942	0.33175	1.40117	0.737673
1724.6	1.03742	0.31476	1.35218	0.722661
1727.3	1.02682	0.307426	1.33424	0.719391
1738.1	0.991739	0.266843	1.25858	0.724896
1755.5	1.00684	0.208895	1.21574	0.797947
1768.9	1.09119	0.241858	1.33305	0.84933
1783.2	1.24002	0.323478	1.5635	0.916542
1806.3	1.42906	0.365091	1.79415	1.06397
1819.9	1.41536	0.352576	1.76793	1.06278
1831.4	1.36363	0.338058	1.70169	1.02557
1865.1	1.24755	0.353965	1.60151	0.893582
1873.5	1.29926	0.368969	1.66823	0.930295
1885.1	1.39309	0.369156	1.76225	1.02394
1913.7	1.48287	0.32753	1.8104	1.15534
1924.7	1.48484	0.326587	1.81142	1.15825
1928.5	1.4904	0.325337	1.81573	1.16506
1945.9	1.55421	0.300944	1.85515	1.25326
1982.7	1.74632	0.107957	1.85428	1.63836
2041.2	1.25358	0.42394	1.67752	0.829642
2045.5	1.2288	0.431858	1.66065	0.796938
2051.8	1.18879	0.441692	1.63048	0.747097
2061.3	1.11716	0.450234	1.5674	0.666929
2107.9	0.687546	0.137597	0.825143	0.549949
2119.6	0.715693	0.182648	0.89834	0.533045
2140.5	0.811786	0.299517	1.1113	0.51227
2155.2	0.858356	0.337827	1.19618	0.520529
2155.8	0.859089	0.33847	1.19756	0.520619
2187	0.830849	0.344024	1.17487	0.486824
2198.7	0.884599	0.386381	1.27098	0.498218
2205.8	0.930939	0.406413	1.33735	0.524526
2216.8	0.993396	0.411678	1.40507	0.581718
2222.1	1.01185	0.402681	1.41453	0.609168
2233.1	1.02246	0.363988	1.38644	0.658467
2239.6	1.01856	0.3312	1.34976	0.687357
2253.9	1.03064	0.258717	1.28936	0.771926
2264.9	1.09079	0.239174	1.32996	0.851612
2280.8	1.23734	0.245455	1.4828	0.991887
2293.4	1.33722	0.232736	1.56995	1.10448
2313	1.32947	0.243163	1.57263	1.0863
2332.2	1.23562	0.245534	1.48116	0.990091
2348.9	1.26373	0.266711	1.53044	0.99702
2355.2	1.2857	0.278713	1.56441	1.00699
2365.9	1.31961	0.294563	1.61417	1.02504
2369.6	1.32985	0.297788	1.62764	1.03207
2372.7	1.33809	0.299319	1.63741	1.03877
2376.9	1.34918	0.299471	1.64865	1.04971
2394.2	1.40905	0.280739	1.68979	1.12831
2415	1.50409	0.341566	1.84566	1.16253
2415	1.50409	0.341566	1.84566	1.16253
2433.8	1.47832	0.500135	1.97846	0.978187
2435.2	1.47031	0.510256	1.98057	0.960056
2442.9	1.41514	0.552566	1.96771	0.862577
2452.3	1.33485	0.564767	1.89961	0.770079
2460.2	1.27192	0.537518	1.80944	0.734405
2467.3	1.22833	0.486999	1.71533	0.74133
2483.1	1.18467	0.332819	1.51749	0.851848
2497.6	1.18294	0.2284	1.41134	0.954536
2501	1.18415	0.214413	1.39857	0.969742
2514.4	1.18598	0.189424	1.3754	0.996551
2530.4	1.15453	0.221857	1.37639	0.932674
2544.2	1.08426	0.277309	1.36157	0.806948
2554.9	1.01305	0.305796	1.31885	0.707254
2557.4	0.99515	0.309325	1.30448	0.685825
2564.4	0.943458	0.312303	1.25576	0.631155
2579.8	0.83076	0.291357	1.12212	0.539403
2588.5	0.776087	0.282469	1.05856	0.493618
2610.7	0.719865	0.349069	1.06893	0.370796
2612.4	0.72435	0.358712	1.08306	0.365639
2619.4	0.762353	0.401121	1.16347	0.361232
2640.2	1.02966	0.451442	1.4811	0.578219
2649	1.13458	0.406494	1.54107	0.728086
2660.7	1.18214	0.33373	1.51587	0.848415
2686.7	1.01371	0.238852	1.25257	0.774863
2695.2	0.961568	0.231589	1.19316	0.729979
2715.9	0.860928	0.295194	1.15612	0.565734
2722.1	0.842726	0.326251	1.16898	0.516475
2743.3	0.852975	0.417751	1.27073	0.435224
2753.4	0.8626	0.432216	1.29482	0.430384
2761	0.861766	0.43686	1.29863	0.424906
2768.6	0.85639	0.442084	1.29847	0.414306
2769.4	0.855665	0.442771	1.29844	0.412894
2787.3	0.83679	0.457862	1.29465	0.378928
2788.8	0.835617	0.458172	1.29379	0.377445
2795.5	0.834619	0.456037	1.29066	0.378583
2805.6	0.857706	0.44229	1.3	0.415416
2812.3	0.896086	0.426588	1.32267	0.469499
2827	1.02414	0.362988	1.38713	0.661152
2828.4	1.03621	0.354477	1.39069	0.681731
2848.2	1.11108	0.24101	1.35209	0.870071
2859.5	1.07934	0.209875	1.28922	0.869469
2864.7	1.06082	0.198137	1.25896	0.862687
2881.9	1.03351	0.179879	1.21339	0.853635
2894.6	1.06729	0.226479	1.29377	0.840812
2907.1	1.11879	0.288613	1.4074	0.830175
2923.5	1.13349	0.336864	1.47035	0.796625
2926	1.12932	0.340007	1.46933	0.789315
2927.2	1.12693	0.341091	1.46802	0.785838
2937.1	1.10305	0.33957	1.44262	0.763479
2939.9	1.09687	0.33599	1.43286	0.76088
2949.8	1.08669	0.31519	1.40188	0.771499
2958.1	1.09814	0.291855	1.39	0.806285
2964.1	1.1176	0.273416	1.39102	0.844188
2987.2	1.2033	0.248347	1.45165	0.954956
3001.2	1.21979	0.311164	1.53096	0.908631
3003.8	1.2213	0.32469	1.54599	0.896607
3020.7	1.23165	0.398256	1.62991	0.833396
3020.8	1.23174	0.398572	1.63031	0.833165
3035.5	1.25084	0.425253	1.67609	0.825586
3047.4	1.27745	0.417831	1.69528	0.859614
3054.7	1.29702	0.400903	1.69792	0.896115
3056.7	1.30233	0.39462	1.69695	0.907712
3069.5	1.32613	0.339413	1.66554	0.986717
3086.5	1.2912	0.267427	1.55863	1.02378
3103.9	1.22295	0.264379	1.48733	0.958569
3110.6	1.21098	0.274159	1.48514	0.936822
3113.5	1.20808	0.278581	1.48666	0.929497
3124.9	1.19969	0.291329	1.49102	0.908366
3140.4	1.1561	0.28257	1.43867	0.873534
3146.1	1.12573	0.267793	1.39352	0.857932
3168.2	1.01103	0.173561	1.18459	0.837472
3176.7	0.991307	0.169598	1.16091	0.821709
3179.7	0.988712	0.180769	1.16948	0.807942
3219	1.189	0.480319	1.66932	0.708678
3224.3	1.19872	0.479929	1.67865	0.71879
3230.8	1.19367	0.473272	1.66694	0.720399
3238.7	1.16089	0.459917	1.62081	0.700973
3249.7	1.06676	0.433474	1.50024	0.633288
3270.7	0.85135	0.379722	1.23107	0.471628
3270.9	0.849889	0.37966	1.22955	0.470229
3274.1	0.828892	0.380992	1.20988	0.4479
3288.1	0.786603	0.441231	1.22783	0.345373
3305	0.752698	0.58694	1.33964	0.165758
3327.7	0.424057	0.601932	1.02599	-0.177876
3347.6	0.412436	0.566394	0.97883	-0.153959
3370.6	0.934809	0.706251	1.64106	0.228558
3383.6	1.17451	0.651613	1.82612	0.522894
3386.6	1.21358	0.633298	1.84688	0.580285
3411.7	1.26777	0.583832	1.8516	0.683941
3421	1.18535	0.617813	1.80316	0.567536
3430.5	1.07443	0.6387	1.71313	0.435727
3440.5	0.954285	0.624344	1.57863	0.329941
3458.5	0.85296	0.549587	1.40255	0.303373
3464.8	0.872263	0.538075	1.41034	0.334189
3469.6	0.903596	0.536306	1.4399	0.36729
3493.5	1.12676	0.524139	1.6509	0.602617
3501.8	1.17604	0.508362	1.6844	0.667679
3522.8	1.22403	0.461598	1.68563	0.762436
3530.2	1.21613	0.444717	1.66085	0.771413
3534.6	1.2029	0.435855	1.63876	0.767048
3555.8	0.992053	0.422763	1.41482	0.56929
3585.2	0.56446	0.300304	0.864764	0.264156
3591.2	0.55736	0.294922	0.852282	0.262439
3603.9	0.600215	0.315063	0.915278	0.285152
3616.4	0.667888	0.341253	1.00914	0.326635
3632	0.734596	0.401658	1.13625	0.332938
3652.4	0.821815	0.545034	1.36685	0.276781
3657.8	0.842734	0.597365	1.4401	0.245369
3688.8	0.948217	1.00564	1.95385	-0.0574192
3700	0.98689	1.0721	2.05899	-0.0852073
3700.7	0.98749	1.07444	2.06193	-0.0869541
3705.5	0.981933	1.08596	2.06789	-0.104025
3730.4	0.586588	1.03806	1.62465	-0.451475
3733.2	0.513941	1.01919	1.53313	-0.505247
3745.1	0.218146	0.899485	1.11763	-0.681339
3779.4	-0.0345914	0.333201	0.29861	-0.367793
3780.5	-0.0334012	0.323267	0.289866	-0.356668
3800.1	0.0223138	0.345489	0.367802	-0.323175
3829.2	0.583579	0.445228	1.02881	0.138351
3859.8	0.903691	0.275781	1.17947	0.627911
3865.7	0.923222	0.289272	1.21249	0.63395
3874.8	0.95021	0.316538	1.26675	0.633672
3887.1	0.967516	0.354405	1.32192	0.613111
3912.4	0.838688	0.343089	1.18178	0.495599
3931.9	0.883281	0.306397	1.18968	0.576885
3954.5	1.02207	0.336055	1.35812	0.686011
3973.4	0.928932	0.388783	1.31771	0.540149
3978.5	0.885693	0.39563	1.28132	0.490063
3993.2	0.764751	0.382007	1.14676	0.382744
3999	0.730569	0.364312	1.09488	0.366257
4023.9	0.784104	0.261534	1.04564	0.52257
4048.7	0.947258	0.105741	1.053	0.841517
4070.2	0.970301	0.109928	1.08023	0.860373
4094.6	0.932149	0.389245	1.32139	0.542905
4122.5	0.980528	0.659867	1.64039	0.320661
4130.5	0.956433	0.672417	1.62885	0.284016
4141.5	0.858015	0.656805	1.51482	0.201209
4157.4	0.6376	0.547652	1.18525	0.0899481
4166.1	0.532899	0.44751	0.98041	0.0853892
4190.3	0.455974	0.302407	0.758381	0.153567
4200.9	0.517758	0.35944	0.877197	0.158318
4223.9	0.670948	0.396503	1.06745	0.274445
4230.3	0.681686	0.380843	1.06253	0.300843
4239.8	0.674848	0.348816	1.02366	0.326032
4273.3	0.714948	0.248967	0.963915	0.465981
4281.5	0.738098	0.235406	0.973504	0.502691
4298.8	0.712483	0.222182	0.934665	0.490301
4319.4	0.548015	0.236334	0.784349	0.311681
4327.5	0.487721	0.242233	0.729954	0.245488
4344.6	0.4601	0.302619	0.762719	0.157482
4356.6	0.537663	0.358762	0.896425	0.1789
4371.9	0.673663	0.36603	1.03969	0.307634
4381.7	0.73976	0.335856	1.07562	0.403904
4417.4	0.853864	0.214485	1.06835	0.639379
4422.4	0.850216	0.21652	1.06674	0.633696
4434.4	0.807659	0.236576	1.04423	0.571083
4454.9	0.639514	0.232172	0.871686	0.407342
4466.3	0.565148	0.194115	0.759263	0.371033
4473.7	0.538638	0.185038	0.723676	0.353601
4489.8	0.506188	0.246185	0.752373	0.260004
4503.2	0.48158	0.317417	0.798997	0.164162
4517.2	0.49393	0.352629	0.846559	0.141301
4521.5	0.510811	0.353618	0.864429	0.157193
4527.5	0.543575	0.346417	0.889992	0.197158
4543.9	0.649106	0.273467	0.922574	0.375639
4551.5	0.675986	0.228267	0.904254	0.447719
4567.6	0.634117	0.212767	0.846884	0.421349
4574.5	0.581428	0.238911	0.820338	0.342517
4593.3	0.405732	0.304099	0.709831	0.101633
4595.3	0.387285	0.309145	0.69643	0.0781399
4603.5	0.31373	0.327395	0.641125	-0.0136652
4614.9	0.214239	0.346406	0.560645	-0.132167
4625.2	0.124295	0.351761	0.476056	-0.227467
4631	0.0740685	0.346711	0.420779	-0.272642
4632	0.0655314	0.345133	0.410665	-0.279602
4647.4	-0.0512866	0.29424	0.242953	-0.345526
4655.3	-0.0873566	0.256958	0.169601	-0.344314
4670.2	-0.0673245	0.223334	0.156009	-0.290658
4683.2	0.0436923	0.226209	0.269901	-0.182516
4698.8	0.185028	0.184538	0.369566	0.000490438
4711.6	0.24146	0.158356	0.399815	0.0831038
4713.7	0.24502	0.15996	0.40498	0.0850599
4722.2	0.244066	0.187481	0.431546	0.0565851
4726.9	0.233549	0.21472	0.448269	0.0188286
4750.6	0.13028	0.379951	0.510232	-0.249671
4756.5	0.107051	0.410331	0.517382	-0.303279
4763.8	0.0750472	0.436156	0.511203	-0.361109
4787.9	-0.108375	0.373867	0.265492	-0.482242
4795.8	-0.148549	0.308901	0.160352	-0.45745
4822.2	-0.0957918	0.211736	0.115944	-0.307528
4831.4	-0.0802579	0.208649	0.128391	-0.288907
4833.3	-0.0791119	0.208934	0.129822	-0.288046
4833.6	-0.0789917	0.20901	0.130018	-0.288002
4849.4	-0.0878344	0.225236	0.137402	-0.313071
4862.6	-0.0791161	0.252514	0.173397	-0.33163
4878.4	0.0109636	0.262223	0.273186	-0.251259
4892.8	0.11029	0.228825	0.339115	-0.118534
4907.2	0.166065	0.209053	0.375118	-0.0429872
4915.7	0.175855	0.206536	0.382391	-0.0306815
4932.7	0.139696	0.188893	0.328589	-0.0491966
4954.2	0.0457537	0.124684	0.170437	-0.0789299
4964.9	0.0217578	0.106879	0.128637	-0.0851214
4976.8	0.016988	0.117995	0.134983	-0.101007
4984.3	0.0193303	0.139786	0.159116	-0.120455
5000.1	0.00223048	0.210148	0.212378	-0.207917
5003.6	-0.0106922	0.227667	0.216975	-0.238359
5021.2	-0.144052	0.292243	0.148191	-0.436295
5050.5	-0.412688	0.373329	-0.0393592	-0.786017
5068.7	-0.306871	0.609881	0.30301	-0.916752
5074.4	-0.231572	0.676415	0.444844	-0.907987
5084.4	-0.0853628	0.756077	0.670714	-0.841439
5094.9	0.0459179	0.782958	0.828876	-0.73704
5098.6	0.0800693	0.779534	0.859603	-0.699465
5101.5	0.101534	0.772506	0.874041	-0.670972
5104	0.116164	0.763484	0.879648	-0.647319
5111.5	0.138441	0.72063	0.859071	-0.582189
5128.2	0.0814613	0.559182	0.640644	-0.477721
5129.4	0.0723799	0.546192	0.618572	-0.473812
5137.9	-0.00844311	0.463685	0.455242	-0.472128
5157.8	-0.263341	0.404137	0.140797	-0.667478
5165	-0.350403	0.412646	0.0622431	-0.763049
5171.7	-0.420881	0.420769	-0.000111946	-0.841649
5181.8	-0.504114	0.426432	-0.0776819	-0.930547
5184.9	-0.523202	0.426597	-0.0966051	-0.949799
5203.9	-0.575022	0.420509	-0.154513	-0.995531
5209.5	-0.577656	0.415294	-0.162361	-0.99295
5210.9	-0.578058	0.413548	-0.16451	-0.991606
5227.1	-0.567438	0.383499	-0.183939	-0.950938
5235.1	-0.531126	0.372219	-0.158907	-0.903345
5252.6	-0.337208	0.359414	0.0222053	-0.696622
5260.6	-0.227939	0.33493	0.106991	-0.562869
5274.7	-0.0740917	0.265485	0.191393	-0.339577
5282.7	-0.0189222	0.234042	0.21512	-0.252964
5301.9	0.0331016	0.258795	0.291897	-0.225693
5310.6	0.0255258	0.298177	0.323703	-0.272651
5319.9	-0.00482402	0.334315	0.329491	-0.339139
5335.2	-0.0741047	0.34732	0.273215	-0.421424
5343.7	-0.0874247	0.3311	0.243675	-0.418524
5365.6	-0.0270316	0.26908	0.242049	-0.296112
5366.7	-0.0238198	0.265852	0.242032	-0.289672
5374.1	-0.00536824	0.245949	0.24058	-0.251317
5386.5	0.0222959	0.223973	0.246269	-0.201677
5390.9	0.0347376	0.219785	0.254523	-0.185048
5399.7	0.0665917	0.213923	0.280515	-0.147332
5410.6	0.114312	0.203406	0.317718	-0.0890937
5426.1	0.171679	0.186222	0.357901	-0.0145438
5445.3	0.212781	0.203746	0.416527	0.00903555
5452.3	0.226806	0.214253	0.44106	0.0125533
5459.3	0.243167	0.223269	0.466436	0.0198978
5481	0.304117	0.242143	0.54626	0.0619742
5510.9	0.443844	0.378854	0.822698	0.0649907
5532.9	0.636963	0.400914	1.03788	0.236049
5537.4	0.648833	0.411064	1.0599	0.237769
5561.2	0.596922	0.479522	1.07644	0.1174
5563.5	0.589017	0.479398	1.06842	0.109618
5567.6	0.575128	0.474662	1.04979	0.100466
5578.6	0.537931	0.434287	0.972217	0.103644
5595.1	0.474248	0.326023	0.800271	0.148224
5596	0.470181	0.320237	0.790418	0.149943
5612	0.373002	0.264018	0.63702	0.108984
5623.8	0.266764	0.263711	0.530475	0.00305265
5639.2	0.146313	0.228524	0.374838	-0.0822107
5645.4	0.124601	0.205644	0.330245	-0.0810434
5663.7	0.148261	0.154946	0.303207	-0.00668497
5675.9	0.173171	0.145243	0.318415	0.0279278
5696.8	0.0895092	0.227221	0.316731	-0.137712
5718.7	0.0122071	0.333608	0.345815	-0.321401
5723.2	0.0221605	0.369791	0.391952	-0.347631
5731	0.0641138	0.448456	0.51257	-0.384343
5747	0.250469	0.62581	0.876279	-0.375341
5762.3	0.455802	0.691982	1.14778	-0.23618
5765.5	0.478861	0.688005	1.16687	-0.209143
5788.4	0.313764	0.547259	0.861023	-0.233494
5802.9	0.152654	0.394802	0.547456	-0.242149
5807.9	0.124116	0.350375	0.474491	-0.226259
5808	0.123692	0.349574	0.473267	-0.225882
5822.1	0.120533	0.279029	0.399562	-0.158496
5852.2	0.4563	0.214112	0.670412	0.242188
5873.1	0.575365	0.1327	0.708065	0.442665
5877.1	0.58661	0.128627	0.715237	0.457984
5898.7	0.604432	0.139463	0.743896	0.464969
5908.4	0.569282	0.173828	0.74311	0.395453
5928.9	0.397944	0.252758	0.650702	0.145186
5932.7	0.357894	0.260762	0.618656	0.0971327
5956.2	0.134871	0.260296	0.395167	-0.125424
5956.3	0.134079	0.260269	0.394347	-0.12619
5966.4	0.0551335	0.263913	0.319047	-0.208779
5975.6	-0.0237857	0.273528	0.249743	-0.297314
5994.7	-0.205027	0.252579	0.0475519	-0.457606
6000.3	-0.24772	0.236061	-0.0116592	-0.483781
6042.9	-0.28668	0.340772	0.0540923	-0.627453
6047.5	-0.293364	0.335283	0.0419188	-0.628647
6058.6	-0.307419	0.31505	0.00763109	-0.62247
6074.6	-0.26385	0.334945	0.071095	-0.598795
6075.8	-0.25491	0.341381	0.086471	-0.596291
6090.5	-0.0605593	0.452887	0.392328	-0.513447
6105	0.246152	0.516338	0.762489	-0.270186
6121.1	0.493002	0.516347	1.00935	-0.0233452
6138.1	0.52622	0.595661	1.12188	-0.0694408
6149.4	0.524522	0.626746	1.15127	-0.102224
6156.1	0.525824	0.620704	1.14653	-0.0948804
6169.6	0.492819	0.559853	1.05267	-0.0670344
6183.6	0.377937	0.476072	0.85401	-0.098135
6196.6	0.236394	0.431302	0.667697	-0.194908
6197.5	0.226083	0.430047	0.65613	-0.203964
6210.7	0.0649183	0.43081	0.495728	-0.365892
6223.5	-0.0960499	0.430647	0.334597	-0.526697
6235.2	-0.20742	0.407731	0.20031	-0.615151
6238.9	-0.231929	0.397832	0.165903	-0.629761
6253.2	-0.293233	0.364174	0.0709409	-0.657408
6266.5	-0.337668	0.361623	0.0239555	-0.699291
6268.6	-0.345045	0.364924	0.0198787	-0.709969
6280.8	-0.383637	0.403581	0.0199441	-0.787219
6294.6	-0.387021	0.48016	0.0931388	-0.867181
6294.8	-0.386507	0.481432	0.0949254	-0.867939
6309.7	-0.290548	0.5677	0.277152	-0.858248
6320.3	-0.164765	0.583115	0.41835	-0.74788
6341.9	0.0207896	0.458585	0.479374	-0.437795
6356.3	-0.0462437	0.433559	0.387315	-0.479803
6367	-0.177748	0.434022	0.256274	-0.611769
6384.3	-0.368981	0.357061	-0.0119207	-0.726042
6395.5	-0.399389	0.331439	-0.06795	-0.730829
6398.2	-0.396773	0.335407	-0.0613664	-0.732181
6406.2	-0.375813	0.363944	-0.0118689	-0.739758
6421.7	-0.327997	0.432029	0.104031	-0.760026
6425.9	-0.322761	0.443148	0.120387	-0.765909
6432.1	-0.324102	0.449614	0.125512	-0.773716
6453.8	-0.36768	0.390447	0.0227665	-0.758127
6464.7	-0.38183	0.368338	-0.0134918	-0.750168
6465.2	-0.382555	0.368239	-0.0143155	-0.750794
6488.8	-0.453112	0.413336	-0.0397761	-0.866448
6494.2	-0.469911	0.418338	-0.0515734	-0.888249
6513.5	-0.489289	0.39119	-0.0980995	-0.880479
6516.6	-0.487458	0.383562	-0.103896	-0.87102
6525.1	-0.473301	0.368001	-0.1053	-0.841302
6548.9	-0.301335	0.434518	0.133183	-0.735853
6555.4	-0.236357	0.455307	0.21895	-0.691664
6568.8	-0.146189	0.461075	0.314886	-0.607264
6579.3	-0.126033	0.440052	0.314019	-0.566086
6589.9	-0.113233	0.42273	0.309497	-0.535963
6608.5	0.0829933	0.492075	0.575068	-0.409082
6624.9	0.439102	0.499077	0.938178	-0.0599752
6644.5	0.791171	0.45983	1.251	0.331341
6645.5	0.806041	0.460768	1.26681	0.345273
6659.4	0.975734	0.488458	1.46419	0.487276
6671.3	1.02847	0.521678	1.55015	0.506793
6678.1	1.01259	0.538438	1.55103	0.474149
6688.5	0.952061	0.542	1.49406	0.410061
6692.7	0.926566	0.533645	1.46021	0.392921
6708.7	0.877598	0.487857	1.36545	0.389742
6721.1	0.881982	0.514737	1.39672	0.367245
6724.6	0.886066	0.53792	1.42399	0.348147
6743.6	0.951202	0.712216	1.66342	0.238986
6746.4	0.968397	0.7362	1.7046	0.232197
6752	1.00429	0.777812	1.78211	0.226482
6777.2	0.935236	0.851648	1.78688	0.0835873
6787.4	0.776651	0.822133	1.59878	-0.0454823
6791	0.71682	0.801719	1.51854	-0.0848988
6799	0.586672	0.737717	1.32439	-0.151045
6822.7	0.299196	0.453681	0.752877	-0.154484
6834.4	0.259393	0.407914	0.667308	-0.148521
6839.9	0.266148	0.432764	0.698912	-0.166615
6869.5	0.356589	0.600436	0.957025	-0.243847
6870.2	0.355403	0.601503	0.956906	-0.2461
6871.5	0.35246	0.603144	0.955605	-0.250684
6877.4	0.325928	0.604968	0.930896	-0.279041
6912	-0.0667675	0.322839	0.256072	-0.389607
6915.7	-0.0819996	0.288602	0.206602	-0.370601
6920.8	-0.0930242	0.255241	0.162217	-0.348265
6922.3	-0.0946203	0.248738	0.154118	-0.343358
6968.7	-0.084031	0.474026	0.389995	-0.558057
6969.7	-0.0845058	0.473222	0.388716	-0.557728
7004.6	-0.0953659	0.3409	0.245534	-0.436266
7015.2	-0.0822176	0.425547	0.343329	-0.507765
7032.6	0.0664257	0.682748	0.749174	-0.616323
7033.2	0.0761156	0.692203	0.768318	-0.616087
7057.2	0.627395	0.852036	1.47943	-0.224642
7077.3	0.694786	0.770263	1.46505	-0.0754771
7090.1	0.628073	0.752484	1.38056	-0.124411
7101.9	0.640721	0.727993	1.36871	-0.0872716
7125.1	0.687154	0.670375	1.35753	0.0167792
7136.1	0.704143	0.669415	1.37356	0.0347275
7148	0.751952	0.676014	1.42797	0.075938
7161.7	0.758244	0.68448	1.44272	0.0737637
7172.4	0.691023	0.685633	1.37666	0.00539033
7181.9	0.616917	0.66874	1.28566	-0.0518235
7185.9	0.594409	0.656313	1.25072	-0.0619038
7215.4	0.818309	0.466975	1.28528	0.351335
7244.5	0.91532	0.290389	1.20571	0.62493
7267	0.700544	0.533223	1.23377	0.167321
7287.9	0.619969	0.663205	1.28317	-0.0432361
7289.2	0.622932	0.667405	1.29034	-0.0444737
7316	0.64247	0.63725	1.27972	0.00521938
7336.8	0.416104	0.519985	0.936089	-0.103881
7342.9	0.386383	0.48822	0.874603	-0.101836
7345.5	0.382496	0.478149	0.860645	-0.0956531
7360.1	0.459793	0.45717	0.916962	0.00262304
7382.8	0.794043	0.341761	1.1358	0.452282
7411.5	0.943251	0.201241	1.14449	0.742009
7416	0.950947	0.213029	1.16398	0.737918
7438.6	0.935512	0.335435	1.27095	0.600077
7462.8	0.687217	0.480571	1.16779	0.206647
7480.7	0.647245	0.534471	1.18172	0.112774
7487.2	0.669833	0.547306	1.21714	0.122527
7517.7	0.723278	0.629687	1.35297	0.093591
7534	0.635149	0.696502	1.33165	-0.0613526
7535.8	0.623072	0.69953	1.3226	-0.0764573
7561.8	0.561734	0.694988	1.25672	-0.133254
7570	0.613775	0.721956	1.33573	-0.108181
7581.6	0.675439	0.799874	1.47531	-0.124434
7611.2	0.516014	1.02707	1.54308	-0.511052
7627.3	0.533731	0.988329	1.52206	-0.454598
7652.1	0.370633	0.800581	1.17121	-0.429949
7662.7	0.418554	0.787812	1.20637	-0.369257
7680.4	0.666444	0.789116	1.45556	-0.122672
7710.1	0.474892	0.503542	0.978434	-0.0286494
7728.9	0.218966	0.433612	0.652578	-0.214646
7756.4	-0.00747429	0.554598	0.547123	-0.562072
7758.7	0.00170792	0.560329	0.562036	-0.558621
7787	0.322695	0.434593	0.757288	-0.111898
7791.6	0.348543	0.391549	0.740092	-0.0430061
7807.8	0.347889	0.335649	0.683538	0.01224
7817.3	0.339267	0.383673	0.72294	-0.0444064
7834.7	0.443021	0.538464	0.981485	-0.0954423
7839	0.501273	0.573363	1.07464	-0.0720896
7862	0.952191	0.589864	1.54205	0.362327
7885.8	0.925458	0.696762	1.62222	0.228696
7910	0.102409	0.715416	0.817825	-0.613007
7935.3	-0.438394	0.31985	-0.118544	-0.758245
7943.6	-0.529834	0.273997	-0.255837	-0.803831
7961	-0.678547	0.265821	-0.412727	-0.944368
7981.8	-0.660513	0.387275	-0.273238	-1.04779
7999.8	-0.471863	0.507007	0.0351443	-0.97887
8001.5	-0.448529	0.51673	0.0682006	-0.965259
8007.1	-0.362996	0.546999	0.184002	-0.909995
8023.4	-0.0269366	0.588513	0.561576	-0.615449
8044.2	0.37862	0.444462	0.823081	-0.0658418
8049.5	0.424895	0.412767	0.837663	0.0121281
8071.6	0.33588	0.55353	0.889411	-0.21765
8097.4	0.0298566	0.690032	0.719888	-0.660175
8107.3	0.0480869	0.663024	0.711111	-0.614937
8140	0.207795	0.345959	0.553754	-0.138163
8155.5	0.193093	0.379228	0.572321	-0.186135
8178.4	0.148019	0.607069	0.755088	-0.45905
8196.6	0.12802	0.660247	0.788267	-0.532226
8205.7	0.163158	0.637458	0.800616	-0.474301
8213.6	0.215028	0.596932	0.811961	-0.381904
8247.8	0.507736	0.294494	0.80223	0.213242
8277.1	0.440371	0.550487	0.990858	-0.110115
8297.1	0.298763	0.622794	0.921557	-0.324031
8306.2	0.261768	0.623612	0.88538	-0.361844
8342.5	-0.0443136	0.4751	0.430787	-0.519414
8378.5	0.544712	0.431055	0.975767	0.113657
8408	0.42792	0.637584	1.0655	-0.209665
8414	0.37689	0.668899	1.04579	-0.292009
8430.1	0.306235	0.700414	1.00665	-0.39418
8438.1	0.305002	0.691129	0.996131	-0.386127
8441.1	0.307509	0.683291	0.9908	-0.375782
8449.4	0.315338	0.648742	0.96408	-0.333404
8471.4	0.262617	0.478799	0.741416	-0.216183
8506.6	-0.197284	0.227201	0.0299174	-0.424485
8544.2	-0.43574	0.141884	-0.293856	-0.577624
8548.4	-0.432486	0.164919	-0.267567	-0.597404
8571.2	-0.228409	0.459571	0.231162	-0.68798
8594.5	0.411177	0.717768	1.12894	-0.306591
8613.8	0.730955	0.866544	1.5975	-0.135589
8639.4	0.66783	1.25918	1.92701	-0.59135
8647.4	0.722665	1.33891	2.06157	-0.61624
8649.2	0.742372	1.35276	2.09513	-0.610384
8668.6	1.00787	1.3574	2.36527	-0.349529
8690	0.814537	1.05438	1.86891	-0.239838
8715.6	0.370897	0.5146	0.885497	-0.143704
8742.7	0.574497	0.541403	1.1159	0.0330939
8752.7	0.520831	0.59864	1.11947	-0.0778091
8770	0.221532	0.621136	0.842668	-0.399604
8788.5	-0.0592859	0.477577	0.418291	-0.536863
8791.1	-0.0805682	0.457505	0.376937	-0.538073
8810.2	-0.0955011	0.408838	0.313337	-0.504339
8816.6	-0.0453151	0.432755	0.38744	-0.47807
8835.4	0.191509	0.49065	0.682159	-0.299141
8840.9	0.25975	0.487926	0.747676	-0.228176
8845.3	0.30807	0.480363	0.788432	-0.172293
8870.5	0.478275	0.428251	0.906527	0.0500238
8876.2	0.498598	0.433162	0.93176	0.0654359
8893.8	0.451693	0.525769	0.977462	-0.0740759
8902.7	0.339378	0.581707	0.921086	-0.242329
8915.9	0.118999	0.596367	0.715366	-0.477369
8922	0.0192216	0.573031	0.592252	-0.553809
8922.3	0.0145132	0.571489	0.586002	-0.556976
8930.1	-0.100153	0.521475	0.421322	-0.621628
8939.8	-0.22279	0.44242	0.21963	-0.66521
8956.1	-0.389212	0.322082	-0.0671296	-0.711294
8969.8	-0.467603	0.307871	-0.159732	-0.775474
8982.6	-0.438717	0.362488	-0.0762295	-0.801205
8996.2	-0.286529	0.409313	0.122784	-0.695842
9009.1	-0.0781255	0.394099	0.315974	-0.472225
9026.8	0.162394	0.353845	0.516239	-0.191452
9038	0.242352	0.380081	0.622433	-0.137728
9052.9	0.263998	0.446385	0.710383	-0.182387
9057.4	0.248649	0.468032	0.716681	-0.219382
9062.4	0.217134	0.49103	0.708164	-0.273896
9085.7	-0.0541475	0.501245	0.447097	-0.555392
9090.3	-0.100017	0.481528	0.381511	-0.581545
9092.2	-0.116298	0.472593	0.356295	-0.588892
9106.4	-0.197292	0.404177	0.206885	-0.601469
9116.2	-0.230252	0.355948	0.125697	-0.5862
9121.9	-0.245947	0.324488	0.0785409	-0.570435
9146.9	-0.268578	0.168702	-0.0998759	-0.43728
9157.2	-0.272177	0.144069	-0.128108	-0.416247
9185.2	-0.366078	0.168962	-0.197116	-0.53504
9191.5	-0.383921	0.164423	-0.219498	-0.548344
9196.6	-0.394562	0.159269	-0.235293	-0.553831
9225.5	-0.459369	0.201436	-0.257933	-0.660805
9256.4	-0.798164	0.209041	-0.589123	-1.0072
9280.7	-0.894467	0.0782896	-0.816177	-0.972756
9306.3	-0.857513	0.0995259	-0.757988	-0.957039
9370.8	0.0563557	0.505305	0.561661	-0.448949
9371.5	0.0569142	0.50516	0.562074	-0.448246
9460	0.0289856	0.383847	0.412832	-0.354861
9471.1	0.0890028	0.38384	0.472843	-0.294837
9645.5	-0.525259	3.65152e-05	-0.525223	-0.525296
9753.2	-0.468162	0.00121107	-0.466951	-0.469373
9854.8	0.371494	0.0865465	0.458041	0.284947
9908.1	-0.109247	0.659823	0.550576	-0.769071
9919.4	-0.222039	0.661863	0.439824	-0.883901
10046.1	-0.629021	1.00764e-05	-0.629011	-0.629031
10221.2	-0.411146	0.368556	-0.0425902	-0.779702
10253.5	0.241335	0.412652	0.653987	-0.171318
10278.2	0.55405	0.247879	0.801929	0.306171
10353.7	-0.0593431	0.0208449	-0.0384982	-0.080188
10503.8	-0.134114	9.61921e-06	-0.134104	-0.134124
10635.3	0.151782	0.43367	0.585452	-0.281887
10664.5	-0.190427	0.410083	0.219656	-0.600511
10676.4	-0.202085	0.36743	0.165345	-0.569515
10757.9	0.118373	0.158627	0.276999	-0.0402539
10792.2	0.377549	0.158619	0.536168	0.21893
10910.4	-1.07865	0.000232333	-1.07842	-1.07889
11034.5	0.336974	8.1551e-05	0.337056	0.336893
11158.6	0.456523	0.00363974	0.460163	0.452883
11171.2	0.457257	0.00363974	0.460897	0.453617
11311.7	0.0280431	1.63854e-06	0.0280447	0.0280414
11452.6	-0.300203	0.284711	-0.0154923	-0.584914
11462.8	-0.337785	0.284711	-0.0530744	-0.622496
11615.8	-0.342675	9.0369e-07	-0.342674	-0.342676
11742.4	-0.310823	0.0684233	-0.242399	-0.379246
11800.9	0.265373	0.0799287	0.345302	0.185445
11810.6	0.276146	0.0675528	0.343698	0.208593
12056.2	-0.157316	1.3014e-05	-0.157303	-0.157329
12180.1	-0.2282	0.165762	-0.0624383	-0.393961
12194.1	-0.185447	0.160527	-0.0249198	-0.345974
12232.9	-0.148038	0.0531537	-0.0948838	-0.201191
12461.1	0.398761	4.91151e-06	0.398766	0.398756
12601.1	-0.583462	0.386514	-0.196948	-0.969976
12628	-0.234519	0.398698	0.164179	-0.633217
12679.3	-0.923274	0.17934	-0.743934	-1.10261
12838.8	0.275175	0.00380946	0.278985	0.271366
12933.4	-0.798094	0.166849	-0.631245	-0.964943
12982.4	-0.0715278	0.167857	0.096329	-0.239385
13047.8	-0.402814	0.0278822	-0.374932	-0.430696
13125.8	-0.598568	0.505095	-0.0934732	-1.10366
13128.2	-0.602239	0.505133	-0.0971062	-1.10737
13210.4	0.274884	0.0194355	0.294319	0.255448
13357.6	-0.159805	0.0301122	-0.129693	-0.189917
13420.3	-0.518781	0.0316574	-0.487124	-0.550439
13468.8	-0.469026	0.0123551	-0.456671	-0.481381
13579.5	-0.443431	0.29919	-0.14424	-0.742621
13600.8	-0.617814	0.299518	-0.318296	-0.917332
13687.7	1.51075	0.0197208	1.53047	1.49103
13792.9	-0.663517	0.138978	-0.524539	-0.802495
13848.7	0.134783	0.47492	0.609704	-0.340137
13886.5	-0.805514	0.50235	-0.303164	-1.30786
13950.9	1.98963	0.216085	2.20571	1.77354
14062.2	0.337274	0.0210949	0.358369	0.31618
14144.1	1.81955	0.021085	1.84063	1.79846
14300.5	-1.11185	1.07242	-0.0394225	-2.18427
14311.2	-1.24258	1.03145	-0.211129	-2.27403
14343.2	-1.33123	0.625064	-0.706165	-1.95629
14372.3	-1.62315	0.521407	-1.10174	-2.14455
14415.7	-0.633535	0.510514	-0.123022	-1.14405
14430.8	-0.796867	0.727448	-0.0694183	-1.52431
14458.2	-1.61496	0.895804	-0.719158	-2.51077
14496.6	-0.954153	0.546275	-0.407879	-1.50043
14563.1	-2.28482	0.461955	-1.82286	-2.74677
14606.7	-0.99738	0.553794	-0.443587	-1.55117
14652.3	-2.20804	0.383438	-1.8246	-2.59148
14759.4	-2.2086	0.0262797	-2.18232	-2.23488
14820.8	-2.48757	0.0637162	-2.42385	-2.55128
14875.9	-1.83872	0.618517	-1.2202	-2.45724
14892.6	-1.72762	0.661942	-1.06567	-2.38956
14924.4	-2.24386	0.600494	-1.64337	-2.84436
14989.2	-2.159	0.28306	-1.87595	-2.44206
15024.4	-1.58489	0.285936	-1.29895	-1.87083
15046	-1.43463	0.23271	-1.20192	-1.66734
15085	-1.36619	0.48402	-0.88217	-1.85021
15089.9	-1.34799	0.480822	-0.867169	-1.82881
15121.9	-1.23809	0.284644	-0.953449	-1.52274
15178.9	-0.876949	0.170802	-0.706147	-1.04775
15186.3	-0.85443	0.168899	-0.685531	-1.02333
15215.3	-0.685669	0.325886	-0.359783	-1.01156
15257.7	0.460554	0.465781	0.926335	-0.00522786
15305.2	1.53691	0.53372	2.07063	1.00319
15342.4	0.600159	0.486204	1.08636	0.113955
15392.4	0.480925	0.0597109	0.540636	0.421214
15450.5	-0.145037	0.310274	0.165237	-0.455311
15484.1	-0.647828	0.282129	-0.3657	-0.929957
15517.2	-0.745461	0.0742402	-0.671221	-0.819701
15549.8	-0.73395	0.187885	-0.546066	-0.921835
15583	-0.934142	0.191938	-0.742205	-1.12608
15589.9	-0.944346	0.178428	-0.765918	-1.12277
15600.6	-0.9501	0.161518	-0.788582	-1.11162
15647.7	-0.931858	0.286001	-0.645857	-1.21786
15680.4	-0.923766	0.478039	-0.445727	-1.40181
15682.6	-0.923122	0.480617	-0.442506	-1.40374
15723.1	-0.711956	0.224315	-0.487641	-0.936271
15750.6	-0.690523	0.17069	-0.519833	-0.861213
15793.5	-1.13452	0.236944	-0.897572	-1.37146
15816	-1.03127	0.206965	-0.8243	-1.23823
15903.8	-0.206061	0.629422	0.423361	-0.835483
15925.2	-0.47971	0.61558	0.13587	-1.09529
15954.1	-0.22224	0.414745	0.192505	-0.636984
15985.7	-0.106652	0.114398	0.00774612	-0.221049
15995.9	-0.133361	0.111031	-0.0223299	-0.244392
16010.2	-0.165154	0.125595	-0.0395593	-0.290749
16040.1	-0.225497	0.308696	0.0831994	-0.534193
16052	-0.334685	0.394626	0.0599409	-0.72931
16064.6	-0.525023	0.443375	-0.0816476	-0.968398
16085.7	-0.91115	0.35265	-0.5585	-1.2638
16100.7	-1.10874	0.239351	-0.869385	-1.34809
16120.6	-1.23918	0.164226	-1.07496	-1.40341
16135.2	-1.21631	0.179496	-1.03681	-1.3958
16160	-1.01508	0.229456	-0.785621	-1.24453
16171.6	-0.907698	0.263787	-0.643911	-1.17148
16195.9	-0.682327	0.258295	-0.424032	-0.940621
16210	-0.645626	0.216465	-0.429161	-0.862091
16230.1	-0.721532	0.271108	-0.450425	-0.99264
16248.2	-0.818013	0.45439	-0.363624	-1.2724
16269.8	-0.620313	0.810398	0.190085	-1.43071
16283.7	-0.358252	0.946872	0.588621	-1.30512
16292.8	-0.210128	0.982942	0.772814	-1.19307
16305	-0.0758685	0.998095	0.922227	-1.07396
16312	-0.0298101	1.00594	0.976131	-1.03575
16314.4	-0.0176331	1.01021	0.992579	-1.02785
16334.8	0.0684295	1.07261	1.14104	-1.00418
16335.5	0.0716798	1.07428	1.14596	-1.0026
16347.9	0.130365	1.07238	1.20275	-0.942016
16355.7	0.160252	1.03367	1.19392	-0.873421
16368.9	0.170693	0.92206	1.09275	-0.751367
16383.7	0.103706	0.804633	0.908339	-0.700928
16384.8	0.0962509	0.79735	0.8936	-0.701099
16392.7	0.0377216	0.74759	0.785312	-0.709869
16400.5	-0.0239144	0.697807	0.673893	-0.721722
16403.6	-0.0482775	0.676976	0.628699	-0.725254
16420.4	-0.16285	0.572909	0.410059	-0.735759
16426.7	-0.195006	0.557103	0.362097	-0.752109
16437.1	-0.245478	0.579044	0.333567	-0.824522
16438.7	-0.254038	0.586953	0.332916	-0.840991
16455.9	-0.348335	0.709652	0.361318	-1.05799
16461.1	-0.360167	0.759749	0.399582	-1.11992
16471	-0.327702	0.884231	0.556529	-1.21193
16472.1	-0.318919	0.900402	0.581483	-1.21932
16472.2	-0.318068	0.90189	0.583822	-1.21996
16491.5	-0.0323355	1.18029	1.14796	-1.21263
16498.1	0.0785046	1.23211	1.31062	-1.15361
16507.8	0.198179	1.23954	1.43772	-1.04137
16509.2	0.209437	1.23384	1.44328	-1.0244
16524	0.210868	1.09091	1.30178	-0.88004
16537	0.0398057	0.901296	0.941102	-0.86149
16539.4	-0.00178601	0.86452	0.862734	-0.866306
16556	-0.253042	0.609664	0.356621	-0.862706
16556.6	-0.259102	0.600934	0.341833	-0.860036
16572.6	-0.320619	0.415346	0.0947272	-0.735965
16572.9	-0.320132	0.413045	0.092913	-0.733177
16591.3	-0.232899	0.368994	0.136095	-0.601893
16607.7	-0.183298	0.420877	0.237579	-0.604175
16608.7	-0.184409	0.424332	0.239923	-0.608742
16625.1	-0.279348	0.465677	0.186329	-0.745025
16633.6	-0.365531	0.478043	0.112511	-0.843574
16645	-0.484757	0.523506	0.0387487	-1.00826
16651.8	-0.556192	0.583112	0.0269201	-1.1393
16661.7	-0.67275	0.705247	0.0324974	-1.378
16663.5	-0.696158	0.729493	0.0333356	-1.42565
16677.8	-0.882539	0.906087	0.0235476	-1.78863
16679.1	-0.896336	0.919302	0.0229663	-1.81564
16692.8	-0.949836	1.02237	0.072531	-1.9722
16694.8	-0.941002	1.03143	0.0904278	-1.97243
16709.4	-0.780463	1.03741	0.256946	-1.81787
16709.4	-0.780463	1.03741	0.256946	-1.81787
16725.7	-0.576795	0.938479	0.361684	-1.51527
16726.7	-0.567768	0.931089	0.363322	-1.49886
16784.8	-0.520333	0.280529	-0.239804	-0.800861
16804.6	-0.432586	0.318863	-0.113723	-0.751449
16812.9	-0.437489	0.332674	-0.104815	-0.770163
16833.7	-0.593862	0.330475	-0.263387	-0.924337
16844.9	-0.710553	0.307532	-0.403021	-1.01809
16866.7	-0.824872	0.344055	-0.480817	-1.16893
16872.2	-0.802063	0.375443	-0.42662	-1.17751
16898.1	-0.454606	0.375288	-0.0793176	-0.829894
16905.6	-0.369546	0.310768	-0.0587776	-0.680314
16928.6	-0.314768	0.190996	-0.123773	-0.505764
16942.3	-0.372198	0.179655	-0.192543	-0.551853
16954.5	-0.427975	0.159515	-0.26846	-0.58749
16967.7	-0.476235	0.133699	-0.342536	-0.609934
17052.9	-0.961177	0.246124	-0.715053	-1.2073
17063.5	-0.972994	0.243437	-0.729557	-1.21643
17063.5	-0.972994	0.243437	-0.729557	-1.21643
17079.1	-0.983263	0.228606	-0.754657	-1.21187
17180.8	-0.950513	0.27872	-0.671793	-1.22923
17197.5	-0.832257	0.25446	-0.577796	-1.08672
17216.5	-0.793442	0.19449	-0.598952	-0.987932
17226.9	-0.813974	0.168632	-0.645343	-0.982606
17244.2	-0.845452	0.129971	-0.715481	-0.975423
17244.7	-0.846001	0.129159	-0.716843	-0.97516
17263.4	-0.866174	0.123002	-0.743173	-0.989176
17283.2	-0.90777	0.130228	-0.777542	-1.038
17302	-0.940516	0.128032	-0.812484	-1.06855
17334.4	-1.08423	0.102298	-0.981931	-1.18653
17344.9	-1.09632	0.0836764	-1.01264	-1.17999
17370.3	-1.05054	0.0738582	-0.97668	-1.1244
17392.7	-1.06696	0.102686	-0.964277	-1.16965
17414.3	-1.19347	0.163663	-1.02981	-1.35713
17436.3	-1.34058	0.229276	-1.11131	-1.56986
17446.2	-1.39405	0.304852	-1.0892	-1.69891
17467.2	-1.37622	0.55459	-0.821634	-1.93081
17480.6	-1.22227	0.655574	-0.566699	-1.87785
17492.4	-1.08239	0.648888	-0.433503	-1.73128
17498.1	-1.03431	0.623486	-0.410827	-1.6578
17512.5	-0.979188	0.539497	-0.439691	-1.51869
17516.6	-0.977374	0.516216	-0.461158	-1.49359
17530	-0.99542	0.449816	-0.545605	-1.44524
17585.6	-0.755612	0.131848	-0.623764	-0.887461
17605.6	-0.740631	0.127506	-0.613125	-0.868138
17619.1	-0.770145	0.126901	-0.643244	-0.897046
17635	-0.837061	0.131217	-0.705843	-0.968278
17651.8	-0.920564	0.13942	-0.781143	-1.05998
17667.4	-0.949754	0.15956	-0.790193	-1.10931
17684	-0.870077	0.226844	-0.643233	-1.09692
17698.4	-0.733268	0.271332	-0.461936	-1.0046
17717.1	-0.611517	0.276613	-0.334904	-0.88813
17745.2	-0.780249	0.201856	-0.578393	-0.982105
17757.3	-0.826886	0.14876	-0.678126	-0.975647
17767	-0.849035	0.139065	-0.70997	-0.9881
17788.7	-0.887602	0.157538	-0.730064	-1.04514
17793.1	-0.890489	0.158316	-0.732172	-1.0488
17817	-0.852951	0.162295	-0.690656	-1.01525
17822.4	-0.833292	0.16967	-0.663622	-1.00296
17837.9	-0.761072	0.224005	-0.537067	-0.985076
17852.3	-0.657712	0.338147	-0.319565	-0.99586
17866.7	-0.48658	0.46292	-0.0236602	-0.9495
17874.2	-0.375958	0.501762	0.125803	-0.87772
17889.5	-0.181128	0.493972	0.312843	-0.6751
17909.7	-0.209807	0.391077	0.18127	-0.600885
17931.3	-0.445672	0.251371	-0.1943	-0.697043
17950.1	-0.566747	0.291974	-0.274773	-0.858721
17963.7	-0.590753	0.381434	-0.209319	-0.972187
17973.6	-0.560387	0.45086	-0.109526	-1.01125
17977.9	-0.531402	0.480673	-0.0507284	-1.01208
17985.2	-0.455436	0.527871	0.0724344	-0.983307
18012.7	0.0339604	0.519649	0.553609	-0.485688
18026.4	0.123808	0.490179	0.613987	-0.366371
18037.6	0.133344	0.505581	0.638925	-0.372237
18048.4	0.140063	0.526955	0.667018	-0.386891
18062.2	0.145578	0.541043	0.686621	-0.395465
18072	0.138574	0.523343	0.661917	-0.384768
18091.1	0.12173	0.401085	0.522815	-0.279355
18101.8	0.0982256	0.313125	0.411351	-0.2149
18132.1	-0.0731724	0.160168	0.0869952	-0.23334
18143	-0.0938909	0.190772	0.0968808	-0.284663
18150.8	-0.0962649	0.249542	0.153277	-0.345807
18172	-0.00999519	0.474149	0.464154	-0.484145
18185.2	0.156752	0.588716	0.745468	-0.431964
18188.4	0.209267	0.608756	0.818023	-0.399489
18211.7	0.542921	0.694011	1.23693	-0.15109
18222.8	0.528108	0.74953	1.27764	-0.221422
18236.4	0.404462	0.775246	1.17971	-0.370784
18251.6	0.292447	0.717426	1.00987	-0.424979
18253.9	0.280126	0.703839	0.983966	-0.423713
18280.7	0.119294	0.484315	0.603609	-0.365022
18338.5	0.160557	0.298816	0.459373	-0.138259
18341.6	0.179017	0.318922	0.497939	-0.139905
18362.9	0.25648	0.443757	0.700237	-0.187277
18381.7	0.210043	0.519431	0.729474	-0.309388
18385	0.207259	0.534722	0.741981	-0.327462
18387.1	0.208379	0.545927	0.754306	-0.337547
18393	0.226815	0.584556	0.811371	-0.357741
18420.9	0.522258	0.70575	1.22801	-0.183492
18435.4	0.499614	0.632065	1.13168	-0.132451
18435.8	0.497106	0.629231	1.12634	-0.132125
18477.8	0.358989	0.122294	0.481283	0.236695
18491.2	0.356851	0.0584427	0.415294	0.298408
18499.5	0.35483	0.0593538	0.414184	0.295477
18558.6	0.975348	0.287772	1.26312	0.687576
18565.5	0.987974	0.299184	1.28716	0.68879
18621.4	0.474382	0.857877	1.33226	-0.383496
18643.5	0.935978	0.749322	1.6853	0.186656
18671.3	0.831713	0.444829	1.27654	0.386884
18677.4	0.730571	0.467459	1.19803	0.263112
18714.7	-0.213176	0.35402	0.140844	-0.567195
18721.6	-0.260994	0.278712	0.0177175	-0.539706
18726.4	-0.274121	0.246298	-0.0278231	-0.520419
18755.7	-0.0699047	0.38125	0.311345	-0.451155
18780	0.318716	0.417117	0.735833	-0.0984013
18838	-0.377098	0.387407	0.0103085	-0.764505
18846.4	-0.388991	0.385372	-0.00361854	-0.774363
18861.8	-0.431508	0.38135	-0.0501579	-0.812859
18923.1	0.0808216	0.249924	0.330745	-0.169102
18932.2	0.0423742	0.279132	0.321507	-0.236758
18958.2	-0.102902	0.373371	0.270469	-0.476273
18963.7	-0.129578	0.382647	0.253069	-0.512224
19015.6	-0.209427	0.223129	0.013702	-0.432557
19035.4	-0.31542	0.19748	-0.11794	-0.5129
19064.1	-0.367488	0.106648	-0.26084	-0.474136
19085.9	-0.338933	0.160756	-0.178177	-0.499689
19113.7	-0.255088	0.247991	-0.00709657	-0.50308
19134.3	-0.25068	0.307283	0.0566036	-0.557963
19157.7	-0.127746	0.340577	0.21283	-0.468323
19160.7	-0.111618	0.338599	0.226981	-0.450217
19209.8	-0.131798	0.121836	-0.00996242	-0.253634
19253.7	-0.0777468	0.217931	0.140184	-0.295678
19268.5	-0.126916	0.217177	0.0902603	-0.344093
19277.4	-0.165109	0.217639	0.0525293	-0.382748
19310.2	-0.402553	0.173268	-0.229286	-0.575821
19320.9	-0.41538	0.178178	-0.237202	-0.593558
19354.3	-0.308132	0.319692	0.0115593	-0.627824
19372.1	-0.366459	0.371006	0.00454636	-0.737465
19417.5	0.217878	0.491645	0.709523	-0.273767
19419.5	0.236107	0.497703	0.73381	-0.261596
19452.5	0.451869	0.734234	1.1861	-0.282365
19478.4	-0.0990613	0.65875	0.559689	-0.757812
19499.3	-0.262197	0.382288	0.120091	-0.644485
19517.8	-0.29875	0.281584	-0.0171658	-0.580335
19534.8	-0.304733	0.227806	-0.0769266	-0.532539
19541.8	-0.304999	0.210233	-0.0947659	-0.515232
19584.7	-0.483927	0.118407	-0.36552	-0.602334
19596.3	-0.511114	0.100747	-0.410367	-0.611861
19623.6	-0.529014	0.067396	-0.461618	-0.59641
19637.5	-0.536439	0.0771074	-0.459332	-0.613547
19653.9	-0.531513	0.126867	-0.404646	-0.658379
19694.2	-0.260883	0.125817	-0.135066	-0.3867
19696.4	-0.258198	0.120465	-0.137733	-0.378663
19733.1	-0.324741	0.14999	-0.174751	-0.474731
19764.1	-0.0699864	0.20922	0.139234	-0.279206
19787.3	0.124872	0.187564	0.312436	-0.0626925
19806.9	0.265101	0.235221	0.500322	0.0298795
19826.4	0.417111	0.260755	0.677867	0.156356
19887.7	0.278841	0.489888	0.76873	-0.211047
19887.7	0.278841	0.489888	0.76873	-0.211047
19908.4	0.170492	0.5485	0.718992	-0.378008
19926.2	-0.0561938	0.553123	0.496929	-0.609316
19959.7	-0.141313	0.24254	0.101228	-0.383853
19990.6	-0.243921	0.100774	-0.143147	-0.344696
20006.9	-0.273037	0.051679	-0.221358	-0.324716
20074.3	-0.444156	0.173425	-0.270731	-0.617582
20097.4	-0.32494	0.173423	-0.151517	-0.498363
20179.2	-0.382909	0.0642903	-0.318618	-0.447199
20198.8	-0.368905	0.104124	-0.264781	-0.473029
20220.2	-0.344356	0.21264	-0.131716	-0.556996
20259.5	-0.396906	0.549702	0.152797	-0.946608
20270.8	-0.311323	0.561981	0.250657	-0.873304
20324.4	-0.143016	0.402301	0.259286	-0.545317
20348.2	-0.304696	0.411326	0.106631	-0.716022
20357	-0.316855	0.400678	0.083823	-0.717533
20425.3	-0.36905	0.0936865	-0.275363	-0.462736
20446.8	-0.319512	0.296087	-0.0234251	-0.615599
20486.6	0.53665	0.369469	0.906119	0.167181
20551.6	0.380543	0.608463	0.989006	-0.227919
20555.9	0.372203	0.599651	0.971854	-0.227447
20590.4	0.45794	0.347746	0.805685	0.110194
20662.8	0.584712	0.411552	0.996264	0.17316
20681.5	0.548943	0.596398	1.14534	-0.0474542
20717.5	0.946566	1.05446	2.00103	-0.107899
20737.9	0.760395	1.12599	1.88638	-0.365592
20743.7	0.748421	1.14392	1.89234	-0.395503
20750.7	0.751331	1.17107	1.9224	-0.419743
20795.6	0.228562	1.47992	1.70848	-1.25136
20823.2	1.08935	1.64583	2.73517	-0.55648
20850.3	0.297922	1.5694	1.86733	-1.27148
20892.4	1.45141	1.54342	2.99482	-0.0920082
20908.4	1.28297	1.57897	2.86194	-0.296006
20910.3	1.25367	1.58136	2.83503	-0.327691
20950.2	0.682653	1.14205	1.8247	-0.459394
20961.6	0.77073	1.03358	1.80431	-0.262855
20995.3	0.435685	0.610489	1.04617	-0.174804
21021.2	-0.0296336	0.322806	0.293172	-0.352439
21044.6	-0.152713	0.243386	0.0906729	-0.396099
21051.3	-0.166003	0.244207	0.0782041	-0.410209
21103.3	-0.0322972	0.180134	0.147836	-0.212431
21123	-0.11417	0.176435	0.0622651	-0.290605
21137.7	-0.162365	0.174299	0.0119342	-0.336664
21149.7	-0.184817	0.180872	-0.00394453	-0.365689
21190.6	-0.0253895	0.191657	0.166267	-0.217046
21222	-0.120453	0.196865	0.0764119	-0.317317
21237.7	-0.103117	0.20422	0.101103	-0.307337
21243.1	-0.0949452	0.210559	0.115613	-0.305504
21252.8	-0.0746943	0.231055	0.156361	-0.30575
21286	0.134367	0.416688	0.551055	-0.28232
21321.3	0.0735566	0.746497	0.820054	-0.67294
21327.9	0.0886633	0.764899	0.853562	-0.676236
21367.2	0.16721	0.853922	1.02113	-0.686711
21377	0.203305	0.834798	1.0381	-0.631493
21405.3	0.0578658	0.65964	0.717506	-0.601775
21425.1	0.0744456	0.624779	0.699224	-0.550333
21426	0.0791453	0.624099	0.703244	-0.544954
21455.5	0.308441	0.473625	0.782067	-0.165184
21510	0.792448	0.389238	1.18169	0.40321
21521.7	0.675159	0.428286	1.10345	0.246873
21560.5	-0.0469149	0.318005	0.27109	-0.36492
21568.7	-0.0862383	0.278374	0.192135	-0.364612
21594.1	-0.105747	0.222349	0.116602	-0.328096
21609.9	-0.133724	0.189543	0.0558194	-0.323267
21618.4	-0.150699	0.172508	0.0218089	-0.323207
21671.3	-0.520279	0.237333	-0.282946	-0.757612
21690.9	-0.638685	0.279554	-0.359131	-0.918239
21698	-0.684239	0.291946	-0.392292	-0.976185
21701.5	-0.708017	0.297254	-0.410763	-1.00527
21712.7	-0.791528	0.308468	-0.48306	-1.1
21725.1	-0.893482	0.306323	-0.587159	-1.19981
21761.5	-0.654286	0.557972	-0.0963144	-1.21226
21782.8	-0.332612	0.524843	0.192231	-0.857456
21788	-0.289052	0.510294	0.221242	-0.799346
21798.1	-0.224415	0.510328	0.285913	-0.734743
21807.9	-0.168975	0.566948	0.397973	-0.735923
21826.7	-0.180459	0.8725	0.692041	-1.05296
21853.1	-0.815078	1.05603	0.240956	-1.87111
21886.6	-0.271618	0.609722	0.338104	-0.88134
21894.8	-0.235682	0.57759	0.341908	-0.813273
21900.9	-0.231229	0.578642	0.347413	-0.809871
21906.5	-0.237698	0.591034	0.353336	-0.828731
21909.9	-0.246327	0.603012	0.356684	-0.849339
21911.1	-0.250369	0.608089	0.35772	-0.858457
21955.3	-0.968533	0.792057	-0.176476	-1.76059
21960.7	-0.993482	0.769248	-0.224234	-1.76273
21999.3	-1.20717	0.377864	-0.82931	-1.58504
22068.1	-1.67228	0.0188587	-1.65342	-1.69114
22165.2	-0.936397	0.337203	-0.599194	-1.2736
22166.5	-0.938339	0.337301	-0.601038	-1.27564
22216	-1.28049	0.131171	-1.14932	-1.41166
22308.6	-1.17745	0.0375531	-1.13989	-1.215
22368.2	-1.14441	0.707349	-0.437058	-1.85176
22399.4	-0.380179	0.74955	0.369371	-1.12973
22431.6	-0.911018	0.561139	-0.349879	-1.47216
22485.4	-0.694883	0.228328	-0.466554	-0.923211
22516.8	-0.471711	1.04084	0.569129	-1.51255
22551.1	1.22072	1.31348	2.5342	-0.0927619
22592.2	-0.706145	0.984988	0.278844	-1.69113
22648.9	1.24906	1.10655	2.35561	0.142507
22662.4	1.28587	1.16185	2.44772	0.124023
22672.9	1.39405	1.1862	2.58026	0.207849
22711.8	1.7355	1.17622	2.91172	0.559276
22742.2	0.401603	1.09528	1.49688	-0.693679
22771	0.582324	0.601334	1.18366	-0.0190102
22817.6	0.301896	0.445685	0.74758	-0.143789
22864.1	1.80021	0.489448	2.28966	1.31077
22914.1	0.440011	0.397295	0.837306	0.042716
22944.1	0.0161873	0.277418	0.293605	-0.261231
22975.6	-0.0299665	0.257351	0.227384	-0.287317
22988.3	0.0167232	0.325205	0.341928	-0.308481
22994	0.0524955	0.363264	0.41576	-0.310769
23022.6	0.398227	0.467171	0.865398	-0.0689446
23060.3	0.206925	0.370778	0.577703	-0.163853
23066.2	0.207383	0.34988	0.557263	-0.142497
23092.5	0.199174	0.313955	0.513129	-0.114782
23125.2	-0.223407	0.433642	0.210235	-0.657049
23133.8	-0.300005	0.425819	0.125814	-0.725825
23204.2	0.51486	0.794321	1.30918	-0.279461
23213	0.567367	0.786186	1.35355	-0.21882
23215.7	0.583563	0.782203	1.36577	-0.19864
23260.9	0.709598	0.559576	1.26917	0.150022
23274	0.594357	0.546209	1.14057	0.0481482
23363.4	0.22904	0.0853728	0.314413	0.143667
23372.9	0.228229	0.0848693	0.313099	0.14336
23401.9	0.180231	0.128028	0.308259	0.0522025
23403.2	0.176152	0.136579	0.31273	0.0395731
23454.5	-0.762389	0.23928	-0.523109	-1.00167
23539	0.525008	0.394281	0.91929	0.130727
23548.3	0.443277	0.470124	0.913401	-0.0268464
23573.5	0.0630433	0.564501	0.627544	-0.501457
23580.6	0.0161201	0.575793	0.591913	-0.559673
23584.9	0.0180379	0.59413	0.612167	-0.576092
23611.4	0.504562	0.669052	1.17361	-0.164489
23628.5	0.660092	0.569481	1.22957	0.0906109
23641.2	0.625622	0.55718	1.1828	0.0684417
23645.7	0.613841	0.555914	1.16976	0.0579272
23689.1	1.11209	0.289862	1.40195	0.822228
23723	0.927146	0.320085	1.24723	0.607061
23764.3	-0.0546458	0.783298	0.728652	-0.837944
23774.9	-0.154801	0.838608	0.683808	-0.993409
23792.4	0.0622982	1.15226	1.21456	-1.08996
23816	1.02164	1.21942	2.24105	-0.197776
23840	1.1178	0.72696	1.84476	0.390837
23878.3	0.499094	0.525959	1.02505	-0.0268652
23908.5	-0.157382	0.446952	0.28957	-0.604334
23926.9	-0.15745	0.481257	0.323807	-0.638706
23956.7	0.460717	0.913874	1.37459	-0.453158
23969.5	0.576071	0.936407	1.51248	-0.360336
23980.6	0.452394	0.988255	1.44065	-0.535862
24001.2	-0.310865	0.994491	0.683626	-1.30536
24021.8	-0.822647	0.632951	-0.189696	-1.4556
24036	-0.802818	0.502146	-0.300672	-1.30496
24047.2	-0.764569	0.447716	-0.316853	-1.21228
24080.6	-1.16124	0.37104	-0.790199	-1.53228
24138.2	-1.28318	0.540449	-0.742734	-1.82363
24138.4	-1.28359	0.539809	-0.743779	-1.8234
24156.9	-1.3418	0.44475	-0.89705	-1.78655
24188.4	-1.46265	0.204444	-1.2582	-1.66709
24199.9	-1.41996	0.344119	-1.07584	-1.76408
24246	0.0772283	0.531864	0.609092	-0.454635
24275.7	-0.469735	0.625358	0.155623	-1.09509
24296.5	-0.682114	0.648772	-0.0333426	-1.33089
24300.8	-0.694528	0.648515	-0.046013	-1.34304
24302.3	-0.697194	0.647795	-0.0493983	-1.34499
24322.4	-0.706794	0.599142	-0.107653	-1.30594
24349.9	-0.967226	0.435655	-0.531572	-1.40288
24416.8	-1.39088	0.304009	-1.08688	-1.69489
24454.8	-1.79073	0.58066	-1.21007	-2.37139
24488.1	-1.32454	0.642879	-0.681662	-1.96742
24505.5	-1.51554	0.585024	-0.930518	-2.10057
24524.7	-1.56304	0.589714	-0.973331	-2.15276
24551.4	-1.22759	0.635547	-0.592038	-1.86313
24559.6	-1.20691	0.62449	-0.582425	-1.8314
24560.5	-1.20743	0.623516	-0.583912	-1.83094
24594.2	-1.3081	0.608253	-0.699852	-1.91636
24616.5	-1.07554	0.692088	-0.383452	-1.76763
24628.4	-0.931337	0.767348	-0.163988	-1.69868
24636.4	-0.807411	0.830877	0.0234657	-1.63829
24659.3	-0.540383	0.951374	0.410991	-1.49176
24679.7	-0.612113	1.10065	0.488535	-1.71276
24682.1	-0.593096	1.13479	0.541693	-1.72789
24710.5	0.245245	1.24021	1.48545	-0.99496
24736.3	0.229374	0.869432	1.09881	-0.640058
24737.2	0.227573	0.863791	1.09136	-0.636219
24743.8	0.235918	0.841604	1.07752	-0.605687
24772.8	0.236656	1.09345	1.3301	-0.856789
24797	-0.562072	0.892478	0.330406	-1.45455
24800.8	-0.640304	0.802315	0.162011	-1.44262
24820.8	-0.733252	0.426398	-0.306853	-1.15965
24841.3	-0.463381	0.454587	-0.00879383	-0.917968
24862.1	-0.0883175	0.611396	0.523079	-0.699714
24883	0.154591	0.728685	0.883276	-0.574094
24890.2	0.202709	0.748993	0.951701	-0.546284
24892.7	0.212809	0.754705	0.967515	-0.541896
24915.9	-0.0174302	0.827301	0.80987	-0.844731
24935.1	-0.486202	0.719172	0.232971	-1.20537
24939.9	-0.570035	0.664028	0.0939935	-1.23406
24996.4	0.0279446	0.651533	0.679477	-0.623588
25013.8	0.187224	0.607413	0.794637	-0.420188
25017.2	0.197387	0.60628	0.803667	-0.408893
25027.2	0.192001	0.647186	0.839187	-0.455185
25054.7	0.375041	1.06665	1.44169	-0.691609
25069.3	0.684339	1.12055	1.80489	-0.436212
25079.5	0.847479	1.08943	1.93691	-0.241952
25085.7	0.916509	1.06639	1.9829	-0.149885
25137.8	-0.058789	0.331972	0.273183	-0.390761
25157.1	-0.127796	0.294325	0.166528	-0.422121
25176.7	-0.22108	0.323295	0.102215	-0.544375
25180.8	-0.236752	0.322539	0.0857871	-0.559291
25185	-0.250076	0.320124	0.0700478	-0.5702
25233.7	-0.236942	0.187558	-0.0493831	-0.4245
25263	-0.379344	0.238127	-0.141218	-0.617471
25267	-0.402819	0.241165	-0.161654	-0.643984
25293.8	-0.592332	0.212702	-0.37963	-0.805035
25298.2	-0.616756	0.21752	-0.399237	-0.834276
25319.5	-0.568756	0.645307	0.0765512	-1.21406
25361.7	1.12398	1.26935	2.39332	-0.14537
25383.7	0.298142	1.2129	1.51104	-0.914761
25396.2	-0.122303	1.04068	0.918381	-1.16299
25461.8	0.439051	0.127076	0.566128	0.311975
25500.4	0.345819	0.419565	0.765384	-0.0737466
25525	-0.0555056	0.466271	0.410766	-0.521777
25535.9	-0.158642	0.420645	0.262003	-0.579287
25567.6	-0.0169711	0.297487	0.280516	-0.314458
25588	-0.0649047	0.301317	0.236412	-0.366221
25595.7	-0.135837	0.324141	0.188304	-0.459979
25630.9	-0.46604	0.261666	-0.204373	-0.727706
25634.3	-0.465609	0.263532	-0.202077	-0.72914
25649.7	-0.45624	0.318152	-0.138088	-0.774391
25651.8	-0.458245	0.331183	-0.127062	-0.789429
25681.6	-0.469001	0.59824	0.129239	-1.06724
25690.1	-0.352647	0.674802	0.322155	-1.02745
25708.2	-0.020204	0.744126	0.723922	-0.76433
25719.4	0.0647924	0.74616	0.810953	-0.681368
25734.5	-0.096164	0.738846	0.642682	-0.83501
25752.8	-0.449339	0.570278	0.120939	-1.01962
25768.2	-0.602166	0.446155	-0.156012	-1.04832
25797.3	-0.338531	0.802485	0.463954	-1.14102
25813.5	0.0781269	0.819741	0.897868	-0.741614
25822.7	0.287174	0.733195	1.02037	-0.446021
25841	0.563887	0.480462	1.04435	0.083425
25864	0.626008	0.349599	0.975607	0.27641
25882.4	0.373182	0.475904	0.849086	-0.102722
25903.5	0.0800006	0.522672	0.602673	-0.442672
25905.8	0.0660479	0.528009	0.594056	-0.461961
25921.6	0.0786802	0.588362	0.667042	-0.509681
25924.6	0.101327	0.601518	0.702845	-0.500191
25929.2	0.147613	0.619654	0.767267	-0.472041
25941.2	0.324782	0.638935	0.963716	-0.314153
25958	0.59196	0.599263	1.19122	-0.00730291
25981.9	0.328702	0.922572	1.25127	-0.59387
25999.6	-0.112448	1.04734	0.934897	-1.15979
26000.7	-0.134661	1.04912	0.914454	-1.18378
26016.2	-0.307242	1.0688	0.761554	-1.37604
26019.7	-0.296005	1.08171	0.785707	-1.37772
26049.1	0.353669	1.02518	1.37885	-0.671508
26049.9	0.367086	1.01486	1.38194	-0.647771
26066.3	0.46935	0.787044	1.25639	-0.317694
26089.4	0.32755	0.591448	0.918998	-0.263898
26115.9	-0.196361	0.847702	0.651341	-1.04406
26124.7	-0.430497	0.839814	0.409317	-1.27031
26147.5	-0.847039	0.716109	-0.13093	-1.56315
26149.9	-0.866319	0.712099	-0.15422	-1.57842
26151.9	-0.878737	0.710774	-0.167963	-1.58951
26161.8	-0.894429	0.723158	-0.171271	-1.61759
26177.2	-0.79914	0.739902	-0.0592376	-1.53904
26182.6	-0.744048	0.731777	-0.0122716	-1.47582
26191.4	-0.637889	0.705423	0.0675333	-1.34331
26205.4	-0.41834	0.649391	0.231051	-1.06773
26222.7	-0.10442	0.610369	0.505949	-0.714788
26247.9	0.0834822	0.719091	0.802574	-0.635609
26248.7	0.0838641	0.721089	0.804954	-0.637225
26256.6	0.0726898	0.72915	0.80184	-0.656461
26261.6	0.0525651	0.723786	0.776351	-0.671221
26288	-0.0127624	0.748949	0.736187	-0.761712
26288.1	-0.0119959	0.750026	0.73803	-0.762022
26289.4	-0.000882925	0.76485	0.763967	-0.765733
26319.5	0.540205	1.04277	1.58298	-0.502569
26323	0.553507	1.03687	1.59038	-0.483368
26341.2	0.271347	0.950806	1.22215	-0.679459
26356	-0.124501	0.759034	0.634533	-0.883535
26370.9	-0.336974	0.570796	0.233823	-0.90777
26394.2	-0.313142	0.596258	0.283116	-0.9094
26399.6	-0.298766	0.603929	0.305163	-0.902696
26401.3	-0.294487	0.60514	0.310653	-0.899627
26410.2	-0.27178	0.603566	0.331786	-0.875346
26419.3	-0.240457	0.593494	0.353037	-0.833951
26427.8	-0.19208	0.583611	0.391531	-0.775692
26451.6	0.0305417	0.590076	0.620617	-0.559534
26497.5	-0.660175	0.603507	-0.0566675	-1.26368
26500	-0.625382	0.617596	-0.00778529	-1.24298
26513.7	-0.337538	0.707569	0.37003	-1.04511
26527.1	0.0298086	0.731015	0.760824	-0.701206
26540.2	0.343076	0.670678	1.01375	-0.327602
26546.4	0.439269	0.641496	1.08077	-0.202227
26590.3	-0.349044	0.848709	0.499665	-1.19775
26591.6	-0.373597	0.846282	0.472685	-1.21988
26620.9	-0.880806	0.695942	-0.184864	-1.57675
26639	-0.916163	0.712056	-0.204107	-1.62822
26648.7	-0.808128	0.82318	0.0150522	-1.63131
26675.7	-0.182756	1.00523	0.82247	-1.18798
26681.2	-0.118345	0.993777	0.875432	-1.11212
26710.3	-0.641769	0.828375	0.186606	-1.47014
26743.8	-1.10677	0.2334	-0.873366	-1.34017
26752.5	-1.10199	0.231872	-0.87012	-1.33386
26763.3	-1.06301	0.296514	-0.766495	-1.35952
26804.2	-0.0816384	0.496329	0.41469	-0.577967
26813.3	0.088041	0.496612	0.584653	-0.408571
26842	0.650378	0.40771	1.05809	0.242668
26863.7	0.608128	0.369394	0.977521	0.238734
26885.9	0.14094	0.584504	0.725444	-0.443564
26915.9	-0.903496	0.667288	-0.236208	-1.57078
26937.1	-1.0356	0.590234	-0.445366	-1.62583
26943.6	-0.979757	0.589285	-0.390472	-1.56904
26953.8	-0.843171	0.587138	-0.256033	-1.43031
26955	-0.824073	0.586251	-0.237823	-1.41032
26974.3	-0.482641	0.53926	0.0566191	-1.0219
26994.5	-0.305413	0.576359	0.270946	-0.881772
27011.9	-0.255953	0.664027	0.408074	-0.91998
27016.4	-0.230271	0.666991	0.43672	-0.897262
27033.3	-0.142847	0.587563	0.444716	-0.73041
27053.9	-0.343153	0.469502	0.126349	-0.812655
27067.3	-0.594704	0.425087	-0.169617	-1.01979
27085	-0.795713	0.407005	-0.388708	-1.20272
27087	-0.806027	0.412546	-0.393481	-1.21857
27092.5	-0.822862	0.43492	-0.387942	-1.25778
27101.8	-0.817798	0.485443	-0.332355	-1.30324
27111.3	-0.779263	0.529463	-0.2498	-1.30873
27116.6	-0.748234	0.540898	-0.207336	-1.28913
27135.5	-0.620414	0.471431	-0.148983	-1.09184
27147.9	-0.516075	0.394112	-0.121963	-0.910186
27171.9	-0.169274	0.587959	0.418685	-0.757233
27185.5	0.0484656	0.79251	0.840976	-0.744044
27201.5	0.225009	0.947465	1.17247	-0.722456
27204.1	0.235907	0.963654	1.19956	-0.727747
27214.6	0.203063	1.01306	1.21613	-0.810001
27223.4	0.0745147	1.02891	1.10343	-0.954397
27228	-0.0221191	1.01986	0.997738	-1.04198
27245.1	-0.397392	0.842202	0.444809	-1.23959
27247.2	-0.42975	0.808974	0.379224	-1.23872
27258.5	-0.500665	0.641349	0.140684	-1.14201
27284	-0.171581	0.410346	0.238766	-0.581927
27292.3	-0.0860465	0.32571	0.239663	-0.411756
27315.7	-0.0949441	0.324596	0.229652	-0.41954
27329.9	-0.30514	0.492193	0.187053	-0.797333
27355.5	-0.7336	0.543179	-0.190421	-1.27678
27360.6	-0.771364	0.538276	-0.233088	-1.30964
27363.4	-0.784884	0.538355	-0.246528	-1.32324
27370.4	-0.794671	0.552014	-0.242657	-1.34668
27378.5	-0.751941	0.598927	-0.153014	-1.35087
27402.8	-0.163174	0.709631	0.546457	-0.872806
27415	0.173865	0.561759	0.735624	-0.387894
27446.5	0.235348	0.500959	0.736306	-0.265611
27462.2	-0.0729704	0.581527	0.508556	-0.654497
27478.8	-0.383588	0.611123	0.227535	-0.99471
27486.6	-0.502118	0.614172	0.112054	-1.11629
27496.8	-0.630239	0.599049	-0.0311904	-1.22929
27497.9	-0.642132	0.595653	-0.0464788	-1.23778
27530.6	-0.695651	0.339393	-0.356258	-1.03504
27552.5	-0.687202	0.362896	-0.324306	-1.0501
27582.5	-1.03562	0.445259	-0.590357	-1.48087
27585.9	-1.06124	0.436451	-0.624792	-1.49769
27588.8	-1.08056	0.427488	-0.653076	-1.50805
27608.8	-1.16846	0.326182	-0.842274	-1.49464
27621.6	-1.1875	0.239191	-0.948305	-1.42669
27644.2	-1.19438	0.266756	-0.927627	-1.46114
27662.7	-1.21843	0.548307	-0.670118	-1.76673
27684.4	-1.2005	0.847993	-0.352507	-2.04849
27692.4	-1.19948	0.893847	-0.305636	-2.09333
27698.1	-1.20517	0.902041	-0.303128	-2.10721
27708.5	-1.22722	0.859642	-0.36758	-2.08687
27731.3	-1.26971	0.536598	-0.733107	-1.8063
27738.1	-1.27615	0.430069	-0.846086	-1.70622
27764.6	-1.26482	0.317983	-0.946835	-1.5828
27788.1	-0.930853	0.455506	-0.475347	-1.38636
27812.4	-0.475815	0.548646	0.0728311	-1.02446
27828.9	-0.402305	0.551624	0.149319	-0.953928
27832.3	-0.417156	0.552317	0.135161	-0.969472
27848.6	-0.540705	0.552032	0.0113278	-1.09274
27857	-0.574812	0.56041	-0.0144019	-1.13522
27864.4	-0.567208	0.579716	0.0125075	-1.14692
27877.2	-0.518196	0.617357	0.0991614	-1.13555
27886.8	-0.529123	0.637947	0.108824	-1.16707
27900.5	-0.695791	0.647058	-0.0487329	-1.34285
27919.2	-0.981983	0.663236	-0.318747	-1.64522
27940.5	-0.686247	1.05954	0.373292	-1.74579
27961.4	-0.204946	1.13035	0.925404	-1.3353
27965.2	-0.141658	1.12634	0.984683	-1.268
27969.7	-0.0706046	1.12614	1.05554	-1.19674
27977	0.0441786	1.14279	1.18697	-1.09861
28000.1	0.285132	1.28943	1.57456	-1.0043
28011.4	0.0918501	1.28561	1.37746	-1.19376
28043.3	-0.74311	0.55276	-0.19035	-1.29587
28043.9	-0.751406	0.543922	-0.207484	-1.29533
28053.4	-0.87782	0.472292	-0.405528	-1.35011
28065.7	-1.06874	0.484433	-0.584307	-1.55317
28081.7	-1.34093	0.448345	-0.892586	-1.78928
28097.1	-1.45768	0.339048	-1.11863	-1.79673
28127.7	-1.1283	0.426768	-0.701536	-1.55507
28140.6	-0.931532	0.512696	-0.418836	-1.44423
28144.3	-0.866603	0.541971	-0.324632	-1.40857
28165.6	-0.357369	0.738919	0.38155	-1.09629
28170.4	-0.207101	0.775862	0.568762	-0.982963
28193.3	0.454292	0.701894	1.15619	-0.247602
28213.4	0.316352	0.74198	1.05833	-0.425628
28216.5	0.239478	0.768586	1.00806	-0.529109
28240.3	-0.29501	0.786085	0.491076	-1.08109
28241.2	-0.305349	0.782993	0.477644	-1.08834
28250.4	-0.35792	0.762036	0.404115	-1.11996
28252.8	-0.356182	0.761611	0.405429	-1.11779
28266.7	-0.222611	0.814617	0.592005	-1.03723
28300.9	0.246479	1.12438	1.37085	-0.877896
28316.2	0.137036	1.09184	1.22887	-0.954801
28325.6	0.144064	0.991615	1.13568	-0.847551
28346.5	0.195255	0.663484	0.858738	-0.468229
28361.6	0.050043	0.629626	0.679669	-0.579583
28367.1	-0.0177045	0.678425	0.66072	-0.696129
28380.3	-0.108313	0.867214	0.758901	-0.975527
28393.3	-0.0220537	1.0512	1.02915	-1.07325
28404.1	0.10256	1.0975	1.20006	-0.994939
28419.2	0.0605333	1.02574	1.08627	-0.965205
28432.7	-0.188739	0.931826	0.743087	-1.12057
28441.2	-0.340445	0.867895	0.527451	-1.20834
28447.9	-0.426893	0.817948	0.391055	-1.24484
28463.3	-0.496651	0.695325	0.198673	-1.19198
28495.1	-0.567289	0.520493	-0.0467955	-1.08778
28499	-0.603444	0.532602	-0.0708419	-1.13605
28518.1	-0.703753	0.614075	-0.0896787	-1.31783
28542.1	-0.294928	0.623823	0.328894	-0.918751
28562.7	0.0686078	0.361877	0.430485	-0.293269
28609.8	0.148531	0.786829	0.935361	-0.638298
28643.7	-0.815847	0.819642	0.00379591	-1.63549
28656.3	-0.804172	0.828833	0.0246608	-1.63301
28665.4	-0.766483	0.853562	0.0870796	-1.62004
28669.8	-0.751898	0.862868	0.11097	-1.61477
28712.8	-1.0485	0.675988	-0.37251	-1.72449
28719.3	-1.10003	0.637003	-0.463029	-1.73704
28747.1	-1.18733	0.564235	-0.623097	-1.75157
28762	-0.969871	0.90611	-0.0637608	-1.87598
28792.4	0.403212	1.07232	1.47553	-0.669109
28822.3	-0.0697663	1.01403	0.944264	-1.0838
28848.7	-1.10896	0.78494	-0.324016	-1.8939
28866	-1.2059	0.551219	-0.654676	-1.75711
28902.7	-0.427302	0.640047	0.212745	-1.06735
28951.1	-1.68227	1.14851	-0.533762	-2.83078
28959.7	-1.45629	1.24327	-0.213019	-2.69956
28978.1	-1.01756	1.25275	0.235192	-2.27031
28996.7	-1.1271	1.09426	-0.032832	-2.22136
29011.2	-1.22955	1.03639	-0.193158	-2.26594
29040.6	-0.519842	1.01625	0.496411	-1.5361
29060.9	-0.881431	0.877052	-0.00437918	-1.75848
29088.1	-1.5789	0.530712	-1.04819	-2.10961
29091.3	-1.60567	0.498832	-1.10684	-2.1045
29123.7	-1.33549	0.359879	-0.97561	-1.69537
29146.2	-1.14216	0.278065	-0.864097	-1.42023
29189.7	-1.60236	0.444867	-1.15749	-2.04723
29199.4	-1.6125	0.465563	-1.14693	-2.07806
29219.1	-1.56534	0.537841	-1.0275	-2.10318
29237.4	-1.38997	0.530176	-0.859791	-1.92014
29272	-1.35018	0.333955	-1.01623	-1.68414
29279.6	-1.36124	0.435286	-0.925956	-1.79653
29315.2	-1.36624	1.18245	-0.183791	-2.54869
29316.8	-1.36968	1.21487	-0.154816	-2.58455
29339.3	-1.13325	1.78036	0.647114	-2.91361
29358.1	-0.295543	2.0456	1.75006	-2.34114
29458.9	-0.303499	1.64106	1.33756	-1.94455
29479.9	-0.618883	1.74708	1.1282	-2.36596
29481.1	-0.616542	1.75741	1.14087	-2.37395
29489.1	-0.552289	1.83695	1.28466	-2.38924
29496	-0.440749	1.91142	1.47067	-2.35217
29585.5	-0.753493	1.44581	0.69232	-2.19931
29596.4	-1.1879	1.34081	0.152918	-2.52871
29623.8	-1.95439	0.631211	-1.32318	-2.5856
29625.2	-1.97073	0.598238	-1.37249	-2.56897
29626.8	-1.98754	0.562483	-1.42505	-2.55002
29656.7	-2.18475	0.224861	-1.95989	-2.40961
29672.8	-2.29074	0.203176	-2.08757	-2.49392
29694.4	-2.25319	0.585131	-1.66806	-2.83832
29735.5	-1.04733	0.940272	-0.107057	-1.9876
29756.5	-1.42481	0.761903	-0.662911	-2.18672
29761.3	-1.49454	0.713084	-0.781458	-2.20763
29769.6	-1.59217	0.633177	-0.95899	-2.22534
29814.6	-1.78761	0.428787	-1.35883	-2.2164
29840	-1.66028	0.492562	-1.16772	-2.15284
29864.1	-1.90036	0.494339	-1.40602	-2.3947
29865.2	-1.90877	0.494511	-1.41425	-2.40328
29874.4	-1.95092	0.519859	-1.43106	-2.47078
29879	-1.94889	0.555084	-1.3938	-2.50397
29893.7	-1.80627	0.758541	-1.04773	-2.56481
29913	-1.37774	0.954854	-0.42289	-2.3326
29913.7	-1.36108	0.956798	-0.404278	-2.31788
29935.4	-0.830704	0.91193	0.0812262	-1.74263
29966.3	-0.303518	0.852465	0.548948	-1.15598
29987.5	-0.685929	0.767474	0.0815445	-1.4534
30012.2	-0.830688	0.464241	-0.366446	-1.29493
30027.3	-0.878665	0.427832	-0.450833	-1.3065
30030.5	-0.896049	0.429926	-0.466123	-1.32598
30059.9	-1.1642	0.510319	-0.65388	-1.67452
30073.3	-1.2147	0.55103	-0.663671	-1.76573
30087.3	-1.07461	0.643918	-0.43069	-1.71853
30107.9	-0.519657	0.697976	0.178319	-1.21763
30136	0.000860749	0.441072	0.441933	-0.440211
30163.5	-0.49625	0.806173	0.309923	-1.30242
30201.7	-1.26892	1.21526	-0.0536576	-2.48419
30206	-1.26514	1.17419	-0.0909513	-2.43932
30231	-1.30512	0.739519	-0.565603	-2.04464
30234.2	-1.33079	0.681122	-0.649669	-2.01191
30257.3	-1.6223	0.415208	-1.2071	-2.03751
30270.8	-1.76493	0.37503	-1.3899	-2.13996
30301.1	-1.78135	0.484637	-1.29671	-2.26599
30306	-1.76629	0.487475	-1.27881	-2.25376
30317.2	-1.70962	0.47992	-1.2297	-2.18954
30342.3	-1.44826	0.382408	-1.06586	-1.83067
30452.5	-1.14424	0.845144	-0.299097	-1.98939
30452.7	-1.14055	0.847132	-0.293416	-1.98768
30475.6	-0.595356	1.00542	0.410065	-1.60078
30475.7	-0.592657	1.00568	0.413022	-1.59834
30496.3	-0.130727	1.03543	0.904705	-1.16616
30526.4	-0.241969	1.44166	1.19969	-1.68363
30534.2	-0.268976	1.48423	1.21525	-1.7532
30539.3	-0.281667	1.48418	1.20251	-1.76585
30559.6	-0.33665	1.23003	0.893384	-1.56668
30573.2	-0.309112	0.900548	0.591436	-1.20966
30587.9	-0.189944	0.578136	0.388192	-0.76808
30615.3	-0.0654123	0.327929	0.262517	-0.393341
30634.5	-0.279944	0.361454	0.0815109	-0.641398
30655	-0.620903	0.315848	-0.305056	-0.936751
30681.6	-0.900244	0.247151	-0.653093	-1.1474
30693.9	-0.898996	0.302092	-0.596904	-1.20109
30694.3	-0.897523	0.305036	-0.592487	-1.20256
30699	-0.872091	0.344264	-0.527827	-1.21636
30728.6	-0.344446	0.460005	0.115558	-0.804451
30744.8	-0.232042	0.314366	0.082324	-0.546408
30771.5	-0.438535	0.237191	-0.201343	-0.675726
30776.7	-0.449535	0.225691	-0.223844	-0.675226
30798.9	-0.416198	0.238036	-0.178162	-0.654234
30818.3	-0.555413	0.337827	-0.217586	-0.89324
30845.9	-1.01068	0.313928	-0.696749	-1.32461
30856.4	-1.13478	0.307636	-0.827148	-1.44242
30881.5	-1.371	0.375026	-0.99597	-1.74602
30918.8	-0.621678	0.473317	-0.14836	-1.09499
30938.8	-0.383137	0.383221	8.36689e-05	-0.766358
30954.5	-0.451758	0.445719	-0.00603877	-0.897477
30970.5	-0.655026	0.506439	-0.148587	-1.16147
30978	-0.761911	0.520571	-0.24134	-1.28248
30981.9	-0.820801	0.528075	-0.292725	-1.34888
31006.6	-1.34831	0.588095	-0.760217	-1.93641
31029.8	-1.8531	0.458272	-1.39483	-2.31137
31069.4	-1.55197	0.312771	-1.23919	-1.86474
31089.6	-1.64285	0.422334	-1.22051	-2.06518
31104.5	-1.82126	0.533555	-1.28771	-2.35482
31119.4	-2.03846	0.540646	-1.49782	-2.57911
31133.4	-2.12801	0.482205	-1.64581	-2.61022
31158.7	-1.74503	0.612871	-1.13216	-2.3579
31174.1	-1.53654	0.803828	-0.732717	-2.34037
31188.8	-1.50564	1.00424	-0.5014	-2.50987
31201.8	-1.46835	1.07305	-0.395303	-2.5414
31220	-1.17143	0.923328	-0.248101	-2.09476
31226.4	-1.02917	0.815163	-0.214005	-1.84433
31245.2	-0.673501	0.476704	-0.196798	-1.1502
31253.5	-0.563726	0.37027	-0.193456	-0.933996
31268	-0.418361	0.320188	-0.0981722	-0.738549
31299.2	-0.134988	0.593297	0.458309	-0.728286
31310.3	-0.116134	0.633058	0.516924	-0.749192
31319.2	-0.171347	0.66586	0.494513	-0.837208
31346.4	-0.722916	0.640148	-0.0827684	-1.36306
31447.3	-0.946285	0.805407	-0.140878	-1.75169
31448	-0.956509	0.810732	-0.145776	-1.76724
31461.2	-1.14233	0.873313	-0.269016	-2.01564
31469.6	-1.21948	0.874461	-0.34502	-2.09394
31481.1	-1.2108	0.848155	-0.362643	-2.05895
31490.5	-1.08822	0.817452	-0.270773	-1.90568
31512.4	-0.621155	0.629056	0.007901	-1.25021
31549.9	-0.786042	0.207177	-0.578865	-0.993219
31553.7	-0.801272	0.182138	-0.619134	-0.98341
31572.8	-0.860971	0.178368	-0.682603	-1.03934
31598	-1.02408	0.236494	-0.78759	-1.26058
31617.4	-1.11508	0.410919	-0.704162	-1.526
31640.6	-1.39572	0.654456	-0.741262	-2.05018
31650.9	-1.55503	0.65288	-0.902153	-2.20791
31672.7	-1.73851	0.463682	-1.27482	-2.20219
31704.5	-1.28381	0.395347	-0.888459	-1.67915
31727.3	-0.963662	0.285469	-0.678194	-1.24913
31737.1	-0.912579	0.22747	-0.685109	-1.14005
31746.6	-0.897464	0.18469	-0.712774	-1.08215
31769.1	-0.909074	0.108108	-0.800965	-1.01718
31797.3	-0.894795	0.10337	-0.791425	-0.998165
31807.2	-0.912701	0.175808	-0.736894	-1.08851
31849.3	-1.6078	0.384449	-1.22335	-1.99225
31879.4	-1.60563	0.622459	-0.983175	-2.22809
31891.4	-1.62421	0.681097	-0.943115	-2.30531
31907.7	-1.83006	0.727466	-1.1026	-2.55753
31936.2	-2.12841	0.848622	-1.27979	-2.97703
31958.2	-1.66554	1.04008	-0.625463	-2.70562
31959.9	-1.62528	1.04125	-0.584034	-2.66653
31978.3	-1.28395	0.935949	-0.348005	-2.2199
31990.3	-1.21455	0.794611	-0.419934	-2.00916
32016.9	-1.29192	0.595503	-0.696419	-1.88742
32030.4	-1.37694	0.655406	-0.721532	-2.03234
32045.6	-1.63908	0.724006	-0.915075	-2.36309
32073	-2.37203	0.538615	-1.83342	-2.91065
32091.3	-2.47436	0.674159	-1.8002	-3.14852
32129.4	-1.09889	0.663916	-0.434971	-1.7628
32144.9	-1.01468	0.456488	-0.558194	-1.47117
32164.9	-0.825681	0.456214	-0.369467	-1.2819
32182	-0.545268	0.411375	-0.133893	-0.956644
32202.9	-0.273998	0.319239	0.0452414	-0.593237
32241.6	0.400274	0.272002	0.672276	0.128272
32342	-0.892873	0.205224	-0.687649	-1.0981
32345.1	-0.895364	0.205232	-0.690132	-1.1006
32431.9	-0.318679	0.0577796	-0.2609	-0.376459
32471.2	-0.187343	0.0574745	-0.129868	-0.244817
32565.6	-0.67274	0.305795	-0.366945	-0.978535
32572.5	-0.654281	0.305794	-0.348488	-0.960075
32786.9	-0.134314	1.1145	0.980188	-1.24881
32792.3	-0.172779	1.11574	0.942961	-1.28852
32856.8	1.51829	0.200928	1.71921	1.31736
33102.9	-0.733453	0.188879	-0.544574	-0.922332
33138.2	-1.05899	0.189732	-0.869258	-1.24872
33191.7	-0.83882	0.0631241	-0.775696	-0.901944
33246.7	-0.566664	0.0620523	-0.504611	-0.628716
33306.2	-0.400723	0.486482	0.0857588	-0.887206
33334.8	-0.797495	0.487111	-0.310384	-1.28461
33359.7	-0.648076	0.390039	-0.258038	-1.03811
33414.5	-0.951965	0.0840617	-0.867903	-1.03603
33495.4	-0.401215	0.00911077	-0.392104	-0.410325
33578.9	-0.568542	0.0190193	-0.549523	-0.587562
33640.3	-0.360207	0.0768091	-0.283397	-0.437016
33709.3	1.16588	0.075432	1.24131	1.09045
33792.2	0.329639	0.0107919	0.340431	0.318848
33900.6	-0.430159	0.687204	0.257044	-1.11736
33911.4	-0.328534	0.687018	0.358484	-1.01555
33984.2	-0.47929	0.0293834	-0.449907	-0.508673
34055.2	-0.68196	0.0210178	-0.660942	-0.702978
34101.4	-0.681253	0.0892151	-0.592038	-0.770468
34121	-0.637661	0.0925574	-0.545104	-0.730218
34186.2	-0.982422	0.0291584	-0.953263	-1.01158
34219.3	-1.00548	0.0205313	-0.984946	-1.02601
34295.2	-0.428342	0.171698	-0.256643	-0.60004
34340.4	-1.00579	0.171289	-0.834499	-1.17708
34414.6	-0.70176	0.0211454	-0.680615	-0.722906
34483.9	-1.08176	0.0230992	-1.05866	-1.10486
34537.8	-0.992696	0.0149502	-0.977746	-1.00765
34605.8	-0.928081	0.00702199	-0.921059	-0.935103
34656.7	-0.87355	0.117752	-0.755798	-0.991301
34706.6	-0.3301	0.156917	-0.173182	-0.487017
34763.8	-1.12999	0.152494	-0.977498	-1.28248
34813.5	-0.505131	0.289867	-0.215264	-0.794998
34848.5	-0.0152689	0.280404	0.265135	-0.295673
34906	0.810327	0.0906307	0.900958	0.719696
34966.3	1.05686	0.0241242	1.08098	1.03273
35044.9	0.813823	0.103355	0.917178	0.710468
35088	0.5264	0.119507	0.645906	0.406893
35134.1	0.740311	0.157465	0.897776	0.582846
35183.6	0.0740345	0.188417	0.262451	-0.114382
35242	-0.701929	0.0691995	-0.632729	-0.771128
35243.1	-0.7025	0.0664227	-0.636078	-0.768923
35313.1	0.369566	0.0956129	0.465179	0.273953
35366.3	0.792257	0.0726443	0.864901	0.719612
35418.1	0.899335	0.0180514	0.917387	0.881284
35528.9	2.02365	0.000466868	2.02411	2.02318
35667.1	-0.798499	0.00244271	-0.796056	-0.800941
35736.7	-0.852102	0.0152698	-0.836832	-0.867372
35801.8	-1.08285	0.0280882	-1.05477	-1.11094
35838.4	-1.15104	0.0786704	-1.07237	-1.22971
35879.5	-1.22373	0.266592	-0.957136	-1.49032
35909.7	-0.888777	0.277833	-0.610944	-1.16661
35966	-0.555753	0.0258668	-0.529886	-0.58162
36042.5	-0.298568	0.118757	-0.179811	-0.417325
36075.6	-0.118318	0.12012	0.00180193	-0.238437
36136.9	0.171783	0.101926	0.273709	0.0698576
36177	0.42206	0.124304	0.546363	0.297756
36237.5	1.04822	0.370661	1.41888	0.67756
36272.3	0.430316	0.368177	0.798493	0.0621385
36348.1	0.514549	0.0325177	0.547067	0.482032
36407.6	0.80657	0.0474322	0.854003	0.759138
36462.4	0.575107	0.0374486	0.612556	0.537659
36512.1	0.631612	0.0134631	0.645075	0.618149
36573.4	0.64634	0.0146185	0.660959	0.631722
36625.9	0.564972	0.0146374	0.579609	0.550334
36749	0.27416	1.93582e-05	0.27418	0.274141
36875.6	0.27156	1.00322e-07	0.27156	0.27156
38290.6	-0.609375	1.11053e-16	-0.609375	-0.609375
38570.8	-0.331622	6.65078e-23	-0.331622	-0.331622
38946.7	-0.795223	3.9204e-31	-0.795223	-0.795223
39272.8	-0.719748	3.9204e-31	-0.719748	-0.719748
39670	-0.971984	5.18955e-18	-0.971984	-0.971984
39913.8	-1.09315	5.18955e-18	-1.09315	-1.09315
40235.6	-0.664051	4.24042e-29	-0.664051	-0.664051
40554.6	-0.238455	2.58675e-13	-0.238455	-0.238455
40759.7	-0.139164	2.58675e-13	-0.139164	-0.139164
41074.7	-0.0884248	2.34079e-18	-0.0884248	-0.0884248
41323.8	-0.374843	2.34079e-18	-0.374843	-0.374843
41609	-0.167724	5.03959e-13	-0.167724	-0.167724
41812.8	-0.305815	5.03959e-13	-0.305815	-0.305815
42088.7	-0.0997973	2.24711e-22	-0.0997973	-0.0997973
42393.3	-0.354367	7.17041e-27	-0.354367	-0.354367
42911.8	-0.571758	1.19314e-61	-0.571758	-0.571758
43379.5	-0.365303	3.71558e-49	-0.365303	-0.365303
43795.1	-0.501773	5.64645e-23	-0.501773	-0.501773
44071.5	-0.563447	9.82067e-23	-0.563447	-0.563447
44354	-1.32585	8.03512e-23	-1.32585	-1.32585
46472.7	-1.34684	1.9869e-25	-1.34684	-1.34684
46768	-1.1417	1.30855e-15	-1.1417	-1.1417
46995.1	-0.933055	1.30855e-15	-0.933055	-0.933055
47266	-0.880566	3.24103e-22	-0.880566	-0.880566
47634.3	-0.882295	0.00216691	-0.880128	-0.884462
47719.7	-0.661447	0.00216691	-0.65928	-0.663614
48562.9	-0.187963	1.3187e-16	-0.187963	-0.187963
48796.9	-0.346057	1.43084e-16	-0.346057	-0.346057
49156.5	-0.112045	6.12241e-33	-0.112045	-0.112045
49493.3	-0.00619251	1.02232e-29	-0.00619251	-0.00619251
49813.4	-0.174594	1.28088e-12	-0.174594	-0.174594
50017.4	0.195014	3.93337e-11	0.195014	0.195014
50204.9	0.0062764	3.93129e-11	0.0062764	0.0062764

## Sheet: Spitzkoppe dD comp.
Age (cal BP)	dD C31	dDC31 sl corr. Shackleton
780.5	-138.541	-138.541
1153	-127.629	-127.568
1649.1	-131.49	-131.23
2100.97	-117.311	-117
2106.8	-125.161	-124.855
2769.77	-121.43	-121.707
3293	-127.683	-128.187
3507	-124.219	-124.739
3788.4	-137.931	-138.474
3966.28	-123.053	-123.611
4125.4	-128.434	-128.954
4858	-126.052	-126.337
5314.32	-138.597	-139.013
5596.9	-122.519	-123.093
5883.84	-117.09	-117.825
6131.2	-127.568	-128.41
6430.7	-136.348	-137.286
6458.59	-147.428	-148.375
6458.59	-140.865	-141.812
6606.1	-128.501	-129.495
6964.9	-136.512	-137.621
7150.5	-133.706	-134.886
7420	-133.399	-134.687
7545.38	-144.688	-146.026
7740.1	-139.445	-140.861
8080.7	-131.96	-133.454
8083.55	-149.408	-150.901
8684.42	-116.432	-117.733
8926.6	-133.465	-134.689
9222.59	-151.081	-152.53
9337.7	-131.115	-132.693
9765.99	-150.042	-152.1
9824.7	-132.458	-134.582
10331.8	-132.703	-135.235
10372.1	-143.837	-146.395
10811.5	-125	-127.839
11332.3	-134	-137.811
12074.5	-149.529	-155.132
12803	-148.249	-154.669
13388.1	-146.765	-154.088
13905.8	-150.47	-158.704
14498.8	-151.97	-161.208
16160.1	-144.288	-156.614
16288.3	-154.047	-166.506
16298.1	-148.345	-160.815
16363	-141.616	-154.154
16433.7	-137	-149.611
16502.2	-147.592	-160.275
16574	-145.822	-158.579
16600.3	-149.174	-161.959
16644.4	-157.326	-170.157
16694.4	-142.747	-155.629
16708.5	-143.231	-156.128
16773.4	-138.294	-151.258
16877.7	-142.148	-155.221
16990.8	-134.068	-147.258
17140	-133.494	-146.851
17287.3	-135.399	-148.921
17411.3	-133.802	-147.463
17525.4	-126.859	-140.647
17776.3	-115.278	-129.347
18007.3	-106.38	-120.696
18141.8	-104.842	-119.094
18426.2	-114.371	-128.486
18663	-129.212	-143.214
19025.5	-122.411	-136.257
19406.1	-134.251	-148.188
20168	-130.185	-144.157
20719.4	-118.931	-132.551
21091.6	-124.757	-138.175
22880.3	-121.501	-134.56
24121.3	-118	-130.65
24683	-117.851	-130.546
25094.8	-119.453	-132.06
25691.2	-112.353	-124.243
25901.4	-110.015	-121.653
26183.8	-99.3947	-111.032
26520.6	-110.127	-121.98
26867.4	-118.92	-130.995
27160.7	-115.109	-127.269
27605.7	-110.903	-123.063
27848.5	-136.627	-148.787
27908.8	-128.738	-140.898
28255.5	-131.387	-143.506
28590.9	-128.495	-140.561
28946.2	-136.421	-148.429
29267.6	-118	-129.764
29606.8	-129.266	-140.732
30001	-111	-122.12
30426.9	-120.096	-131.216
30804.2	-129.324	-140.444
31599.6	-116.45	-127.474
32594.2	-124	-134.865
